1 Uncyclized xanthommatin is a key ommochrome intermediate in invertebrate coloration

2 **Short title:** Uncyclized xanthommatin in ommochrome biosynthesis

3 **Florent Figon<sup>1\*</sup>, Thibaut Munsch<sup>2</sup>, Cécile Croix<sup>3</sup>, Marie-Claude Viaud-Massuard<sup>3</sup>, Arnaud**

4 **Lanoué<sup>2</sup>, and Jérôme Casas<sup>1</sup>**

5 From the <sup>1</sup>Institut de Recherche sur la Biologie de l’Insecte, UMR CNRS 7261, Université de Tours,

6 37200 Tours, France; <sup>2</sup>Biomolécules et Biotechnologies Végétales, EA 2106, Université de Tours,

7 37200 Tours, France; <sup>3</sup>Génétique, Immunothérapie, Chimie et Cancer, UMR CNRS 7292, Université

8 de Tours, 37200 Tours, France

9 \*To whom correspondence should be addressed: Florent Figon: Institut de Recherche sur la Biologie  
10 de l’Insecte, UMR CNRS 7261, Université de Tours, 37200 Tours, France; [florent.figon@univ-](mailto:florent.figon@univ-tours.fr)  
11 [tours.fr](mailto:florent.figon@univ-tours.fr); Tel. +33 (0)2 47 36 69 81; Fax. +33 (0)2 47 36 69 66.

12 **Author contributions:** F. F., A. L. and J. C. conceptualization; F. F. data curation; F. F. formal  
13 analysis; M.-C. V.-M., A. L. and J. C. funding acquisition; F. F., T. M. and C. C. investigation; F. F.,  
14 T. M., C. C., A. L. and J. C. methodology; F. F., A. L. and J. C. project administration; M.-C. V.-M.,  
15 A. L. and J. C. resources; J. C. supervision; F. F., A. L. and J. C. validation; F. F. visualization; F. F.  
16 and J. C. writing – original draft; F. F., T. M., C. C., M.-C. V.-M., A. L. and J. C. writing – review &  
17 editing.

18 **Abbreviations:** CE, collision energy; CV, cone voltage; DAD, diode-array detector; ESI<sup>+</sup>, positive-  
19 mode electron spray ionization; LC, liquid chromatography; MeOH-HCl, acidified methanol with 0.5  
20 % hydrochloric acid; MRM, multiple reaction monitoring; MS, mass spectrometry; MS/MS, tandem  
21 mass spectrometry; MW, molecular weight; *m/z*, mass-to-charge ratio; NMR, nuclear magnetic  
22 resonance; RT, retention time; SD, standard deviation; SE, standard error; SIR, single ion recording;  
23 UV, ultraviolet.

24 **Abstract**

25 Ommochromes are widespread pigments that mediate multiple functions in invertebrates. The two  
26 main families of ommochromes are ommatins and ommins, which both originate from the kynurenine  
27 pathway but differ in their backbone, thereby in their coloration and function. Despite its broad  
28 significance, how the structural diversity of ommochromes arises *in vivo* has remained an open  
29 question since their first description. In this study, we combined organic synthesis, analytical  
30 chemistry and organelle purification to address this issue. From a set of synthesized ommatins, we  
31 derived a fragmentation pattern that helped elucidating the structure of new ommochromes. We  
32 identified uncyclized xanthommatin as the elusive biological intermediate that links the kynurenine  
33 pathway to the ommatin pathway within ommochromosomes, the ommochrome-producing organelles.  
34 Due to its unique structure, we propose that uncyclized xanthommatin functions as a key branching  
35 metabolite in the biosynthesis and structural diversification of ommatins and ommins, from insects to  
36 cephalopods.

37 **Keywords:** high-performance liquid chromatography (HPLC), kynurenine, mass spectrometry (MS),  
38 ommin, ommochromosome, ultraviolet-visible spectroscopy (UV-Vis spectroscopy)

39 **1. Introduction**

40 Ommochromes are widespread phenoxazinone pigments of invertebrates. They act as light filters in  
41 compound eyes and determine the integumental coloration of a large range of invertebrates (Figon and  
42 Casas, 2019). Ommochromes are also of particular interest in applied sciences as their scaffold has  
43 been used to design antitumor agents (Bolognese et al., 2002) and, very recently, to manufacture  
44 biomimetic color changing electrochromic devices (Kumar et al., 2018). The two major families of  
45 natural ommochromes are the yellow-to-red ommatins and the purple ommins that contain a  
46 supplemental phenothiazine ring. Ommatins are currently the best described family of ommochromes  
47 and occur throughout invertebrates. Ommins are much less characterized, although they are virtually  
48 ubiquitous in insects and cephalopods (Needham, 1974; Riddiford and Ajami, 1971). After nearly 80

*Uncyclized xanthommatin in ommochrome biosynthesis*

49 years and despite their broad significance, the structural and chemical relationships between these two  
50 abundant families of ommochromes remain surprisingly mysterious (Figon and Casas, 2019).

51 The early steps of the biosynthesis of ommochromes in invertebrates cover the oxidation of  
52 tryptophan into kynurenines (Fig 1B) (Figon and Casas, 2019), from insects (Linzen, 1974) and  
53 spiders (Croucher et al., 2013) to planarians (Stubenhaus et al., 2016) and cephalopods (Williams et  
54 al., 2019b). These oxidative steps are homologous to the kynurenine pathway of vertebrates in which  
55 the last enzyme, the mitochondria-bound kynurenine 3-monooxygenase, catalyzes the formation of 3-  
56 hydroxykynurenine. This *ortho*-aminophenolic amino acid is the currently accepted last common  
57 precursor of all known ommochromes, from ommatins to ommins (Fig 1B) (Figon and Casas, 2019).  
58 The catabolism of tryptophan then diverges from vertebrates because invertebrates lack the glutarate  
59 pathway but possess the ommochrome pathway (Linzen, 1974).

60 Ommochromes are produced within specialized intracellular organelles, called  
61 ommochromosomes, most likely after the incorporation of 3-hydroxykynurenine (Figon and Casas,  
62 2019; Mackenzie et al., 2000). Two hypotheses have been proposed to explain how ommatins  
63 originate from there. (1) It has been suggested very early, but on weak evidence, that the oxidative  
64 dimerization of 3-hydroxykynurenine into uncyclized xanthommatin and its subsequent intramolecular  
65 cyclization account for the biosynthesis of ommochromes (Fig 1B) (Butenandt and Schäfer, 1962). (2)  
66 The condensation of *ortho*-aminophenols with xanthurenic acid has been proposed to form directly the  
67 oxo-pyrido[3,2-*a*]phenoxazinone chromophore of ommatins (Fig 1B) (Linzen, 1974; Panettieri et al.,  
68 2018). Hypothesis 1 is currently more accepted because ommatins can be synthesized *in vitro* by the  
69 oxidative condensation of 3-hydroxykynurenine, which is predicted to form an unstable intermediate,  
70 the 3-hydroxykynurenine dimer called uncyclized xanthommatin (Butenandt and Schäfer, 1962; Figon  
71 and Casas, 2019; Iwahashi and Ishii, 1997; Williams et al., 2019a; Zhuravlev et al., 2018).  
72 Furthermore, uncyclized xanthommatin was speculated in biological extracts (Bolognese and  
73 Scherillo, 1974), putatively identified in the *in vitro* oxidation of 3-hydroxykynurenine (Iwahashi and  
74 Ishii, 1997) and its enzymatic formation predicted *in silico* by quantum calculations (Zhuravlev et al.,

*Uncyclized xanthommatin in ommochrome biosynthesis*

75 2018). However, it has never been formerly extracted and characterized in biological samples.  
76 Alternatively, hypothesis 2 does not involve the formation of any intermediate between the kynurenine  
77 pathway and the ommatin pathway. Hence, to discriminate between the two hypotheses, one needs to  
78 determine whether uncyclized xanthommatin is produced *in vivo* (Fig 1B). Finding this still-elusive  
79 intermediate in biological extracts would therefore be a major step in characterizing the actual  
80 biosynthetic pathway of ommochromes.

81 Deciphering the ommochrome pathway requires the characterization of metabolites in  
82 biological extracts. However, biological ommochromes are remarkably refractory to NMR  
83 spectroscopy, partly because of their poor solubility in most conventional solvents (Bolognese et al.,  
84 1988b; Crescenzi et al., 2004; Parrilli and Bolognese, 1992). It was only very recently that the first <sup>1</sup>H-  
85 NMR spectrum of xanthommatin, whose structure has been known for 60 years, was published after  
86 extensive purification and optimization steps (Kumar et al., 2018). However, from a theoretical point  
87 of view, mere <sup>1</sup>H-NMR data cannot provide enough information on the exact structure of  
88 ommochromes. Indeed, they are rather poor in carbon-bonded hydrogens, which prevents access to all  
89 positions in the structure. Furthermore, they are redox/pH sensitives and prone to tautomerization,  
90 which complicate <sup>1</sup>H spectra greatly. Since our main target compound, uncyclized xanthommatin, is  
91 unstable in solution (Bolognese et al., 1988a; Bolognese and Scherillo, 1974), it is highly improbable  
92 that gold-standard techniques for structural elucidation, such as <sup>13</sup>C- and 2D-NMR, can be used  
93 because they suffer from too low sensitivity. In order to elucidate the biological diversity of  
94 ommochromes, one should therefore look for a combination of more sensitive analytical techniques  
95 that provide orthogonal information, such as mass spectrometry and UV-Visible spectroscopy. For  
96 nearly a decade, mass spectrometry (MS) has been used to elucidate the structure of both known and  
97 unknown ommochromes from biological samples (Futahashi et al., 2012; Panettieri et al., 2018; Reiter  
98 et al., 2018; Williams et al., 2016). Yet, evidence for common and compound-specific fragmentation  
99 patterns of ommochromes are scarce [but see (Panettieri et al., 2018; Reiter et al., 2018)]. Together  
100 with the seldom use of synthesized ommochromes, this lack of analytical data accounts for the very

*Uncyclized xanthommatin in ommochrome biosynthesis*

101 little progress made since four decades to unravel the biological diversity of ommochromes (Figon and  
102 Casas, 2019).

103 In this study, we synthesized xanthommatin and its decarboxylated form by the oxidative  
104 dimerization of 3-hydroxykynurenine. Knowing that ommatins are methoxylated in acidified methanol  
105 (MeOH-HCl), we incubated synthesized xanthommatin in MeOH-HCl to produce a range of ommatin-  
106 derivatives. We constructed an analytical dataset of those ommatins by a combination of UV-Visible  
107 spectroscopy, and (tandem) mass spectrometry after separation by liquid chromatography. From this  
108 dataset, we derived a fragmentation pattern with valuable structural information, especially when  
109 combined with UV-Visible spectra, to infer the structure of new ommochromes with strong  
110 confidence. Hence, we could elucidate the structure of three methoxylated ommatins and, more  
111 importantly, of uncyclized xanthommatin. Our experiments demonstrated that ommatins are easily and  
112 rapidly methoxylated leading to artifacts in conditions matching standard extraction procedures from  
113 biological samples. By combining our analytical tools with an artifact-free extraction protocol and a  
114 subcellular fractionation of ommochromosomes, we reinvestigated the ommochromes of housefly  
115 eyes. We could identify xanthommatin, decarboxylated xanthommatin and uncyclized xanthommatin  
116 in ommochromosomes. Our results provide strong support to the hypothesis that ommatin biosynthesis  
117 occurs in subcellular organelles through the dimerization of 3-hydroxykynurenine and its subsequent  
118 intramolecular cyclization (hypothesis 1, Fig 1B). Furthermore, the unique structure of uncyclized  
119 xanthommatin makes it a good candidate to link the biosynthetic pathways of ommatins and ommins,  
120 which has important implications on how ommochromes have diversified in a wide range of  
121 phylogenetically-distant species.

## 122 **2. Material and Method**

### 123 **2.1 Insects**

124 Houseflies (*Musca domestica*) were obtained at the pupal stage from Kreca. After hatching, houseflies  
125 were either directly processed for ommochromosome purification or stored at -20 °C for ommochrome  
126 extraction.

127 **2.2 Reagents**

128 Sodium dihydrogen phosphate, sodium hydrogen phosphate, L-kynurenine ( $\geq 98\%$ ), 3-hydroxy-D,L-  
129 kynurenine, trifluoroacetic acid (TFA), Triton X-100, tris(hydroxymethyl)aminomethane (Tris),  
130 potassium ferricyanide, magnesium chloride, potassium chloride, potassium pentoxide and  
131 cinnabaric acid ( $\geq 98\%$ ) were purchased from Sigma-Aldrich. Methanol, potassium chloride and  
132 hydrochloric acid (37%) were purchased from Carlo Erba reagents. Nycodenz® was purchased from  
133 Axis Shield. L-tryptophan ( $\geq 99\%$ ) and xanthurenic acid ( $\geq 96\%$ ) were purchased from Acros  
134 Organics. Sucrose (99%) and sulfurous acid ( $\geq 6\% \text{ SO}_2$ ) were purchased from Alfa Aesar.  $\beta$ -  
135 Mercaptoethanol was purchased from BDH Chemicals. Acetonitrile and formic acid were purchased  
136 from ThermoFischer Scientific.

137 **2.3 In vitro synthesis of xanthommatin**

138 *2.3.1 Oxidative condensation of 3-hydroxykynurenine under anoxia*

139 A mixture of ommatins was synthesized by oxidizing 3-hydroxy-D,L-kynurenine with potassium  
140 ferricyanide as previously described (Butenandt et al., 1954; Hori and Riddiford, 1981), with some  
141 modifications. In a round bottom flask under argon, a solution of 44.6 mM of 3-hydroxy-D,L-  
142 kynurenine was prepared by dissolving 455  $\mu\text{mol}$  (102 mg) in 10.2 mL of 0.2 M phosphate buffer at  
143 pH 7.1 (PB). In a second round bottom flask under argon, 174 mM of potassium ferricyanide (303 mg)  
144 were dissolved in 5.3 mL of PB. Both solutions were purged with argon and protected from light. The  
145 potassium ferricyanide solution was added slowly to the solution of 3-hydroxy-D,L-kynurenine. The  
146 resulted reaction mixture was stirred at room temperature for 1 h 30 in darkness. Then, 10 mL of  
147 sulfurous acid diluted four times in PB was added. The final solution was brought to 4 °C for 30 min  
148 during which red flocculants formed. The suspension was then transferred into a 50 mL centrifuge  
149 tube. The round bottom flask was rinsed with 8 mL of sulfurous acid previously diluted four times in  
150 PB to ensure the complete reduction and flocculation of synthesized ommatins, as well as to remove  
151 ferrocyanide. The final suspension was centrifuged for 10 min at  $10\,000 \times g$  and at 4 °C. The solid

### *Uncyclized xanthommatin in ommochrome biosynthesis*

152 was desiccated overnight under vacuum over potassium hydroxide and phosphorus pentoxide. 104 mg  
153 of a reddish brown powder was obtained and kept at 4 °C in darkness until further use.

#### 154 *2.3.2 Solubilization and analyses of synthesized ommatins*

155 A solution of synthesized ommatins at 1 mg/mL of was made in methanol acidified with 0.5 % HCl  
156 and pre-cooled at -20 °C (MeOH-HCl). The solution was mixed for 30 s and filtered on 0.45 µm  
157 filters. All steps were performed, as much as possible, at 4 °C in darkness. The overall procedure took  
158 less than two minutes. Immediately after filtration, the solution was subjected to absorption and mass  
159 spectrometry analysis (see below). The filtered solution was then stored at 20 °C in darkness and  
160 subjected to the same analysis 24 hours later.

#### 161 **2.4 Nuclear Magnetic Resonance (NMR) Spectroscopy**

162 One milligram of synthesized product was solubilized in 600 µL of d6-DMSO acidified with 25 µL of  
163 TFA, as previously described (Kumar et al., 2018; Williams et al., 2019a). NMR spectra were  
164 recorded on Bruker AVANCE AV 300 instruments and the NMR experiment was reported in units,  
165 parts per million (ppm), using residual solvent peaks d6-DMSO ( $\delta = 2.50$  ppm) for <sup>1</sup>H NMR as  
166 internal reference. Multiplicities are recorded as: s = singlet, d = doublet, t = triplet, dd = doublet of  
167 doublets, m = multiplet, bs = broad singlet. Coupling constants (J) are reported in hertz (Hz).

168 <sup>1</sup>H NMR (300 MHz, d6-DMSO + 0.04 % TFA)  $\delta$  8.37 (bs, 3H, H<sub>1</sub>), 8.21 (bs, 1H, NH<sub>8</sub>), 8.04 (t, J =  
169 4.5 Hz, 1H, H<sub>5</sub>), 7.83 - 7.82 (m, 2H, H<sub>4</sub>, H<sub>6</sub>), 7.69 (s, 1H, H<sub>7</sub>), 6.67 (s, 1H, H<sub>9</sub>), 4.46 - 4.42 (m, 1H,  
170 H<sub>2</sub>), 3.89 (bs, 2H, H<sub>3</sub>).

#### 171 **2.5 Ultra-Pressure Liquid Chromatography coupled to Diode-Array Detector and** 172 **Electrospray Ionization Source-based Mass Spectrometer (UPLC-DAD-ESI-MS)**

##### 173 *2.5.1 System*

174 A reversed-phase ACQUITY UPLC® system coupled to a diode-array detector (DAD) and to a Xevo  
175 TQD triple quadrupole mass spectrometer (MS) equipped with an electrospray ionization source (ESI)

## *Uncyclized xanthommatin in ommochrome biosynthesis*

176 was used (Waters, Milford, MA). Tandem mass spectrometry (MS/MS) was performed by collision-  
177 induced dissociation with argon. Data were collected and processed using MassLynx software, version  
178 4.1 (Waters, Milford, MA).

### 179 *2.5.2 Chromatographic conditions*

180 Analytes were separated on a CSH™ C18 column (2.1 x 150 mm, 1.7 µm) equipped with a CSH™  
181 C18 VanGuard™ pre-column (2.1 x 5 mm). The column temperature was set at 45 °C and the flow  
182 rate at 0.4 mL/min. The injection volume was 5 µL. The mobile phase consisted in a mixture of MilliQ  
183 water (eluent A) and acetonitrile (eluent B), both prepared with 0.1 % formic acid. The linear gradient  
184 was set from 2 % to 40 % B for 18 min.

### 185 *2.5.3 Spectroscopic conditions*

186 The MS continuously alternated between positive and negative modes every 20 ms. Capillary voltage,  
187 sample cone voltage (CV) and collision energy (CE) were set at 2 000 V, 30 V and 3 eV, respectively,  
188 for MS conditions. CE was set at 30 eV for tandem MS conditions. Cone and desolvation gas flow  
189 rates were set at 30 and 1 000 L/h, respectively. Absorption spectra of analytes were continuously  
190 recorded between 200 and 500 nm with a one-nm step. Analytes were annotated and identified  
191 according to their retention times, absorbance spectra, mass spectra and tandem mass spectra (Table  
192 1).

## 193 ***2.6 Thermal reactivity of ommatins in acidified methanol in darkness***

### 194 *2.6.1 Conditions of solubilization and incubation*

195 Solutions (n = 5) of synthesized ommatins at 1 mg/mL were prepared in MeOH-HCl. The solutions  
196 were mixed for 30 s and filtered on 0.45 µm filters. Aliquots of 50 µL were prepared for each sample  
197 and stored at either 20 °C or -20 °C in darkness. All steps were performed, as much as possible, in  
198 darkness and at 4 °C. The overall procedure for each sample took less than two minutes. During the  
199 course of the experiment, each aliquot was analyzed only once by UPLC-ESI-MS/MS, representing a  
200 single time point for each sample.



## 201 2.6.2 Quantification of ommatins

202 Unaltered (*i.e.* xanthommatin and its decarboxylated form) and their methoxylated forms were  
203 detected and quantified by absorption and MS/MS (single reaction monitoring [MRM] mode)  
204 spectrometry. MRM conditions were optimized for each ommatin based on the following parent-to-  
205 product ion transitions: xanthommatin  $[M+H]^+$  424>361  $m/z$  (CV 38 V, CE 25 eV),  $\alpha^3$ -methoxy-  
206 xanthommatin  $[M+H]^+$  438>375  $m/z$  (CV 37 V, CE 23 eV),  $\alpha^3, \alpha^{11}$ -dimethoxy-xanthommatin  $[M+H]^+$   
207 452>375  $m/z$  (CV 38 V, CE 25 eV), decarboxylated xanthommatin  $[M+H]^+$  380>317  $m/z$  (CV 34 V,  
208 CE 28 eV) and decarboxylated  $\alpha^{11}$ -methoxy-xanthommatin  $[M+H]^+$  394>317  $m/z$  (CV 34 V, CE 28  
209 eV). See Fig S2 for detailed information on MS/MS optimization. Peak areas for both absorption and  
210 MRM signals were calculated by integrating chromatographic peaks with a “Mean” smoothing method  
211 (window size:  $\pm 3$  scans, number of smooths: 2). Absorbance values at 414 nm of unaltered ommatins  
212 were summed and reported as a percentage of the total absorbance of unaltered and methoxylated  
213 ommatins. The decay at -20 °C of uncyclized xanthommatin was followed by integrating both the  
214 absorbance at 430 nm and the 443  $m/z$  SIR signals associated to the chromatographic peak of  
215 uncyclized xanthommatin at RT 6.7 min.

## 216 **2.7 Extraction and content analysis of housefly eyes**

### 217 2.7.1 Biological extractions

218 Five housefly (*M. domestica*) heads were pooled per sample ( $n = 5$ ), weighted and homogenized in 1  
219 mL MeOH-HCl with a tissue grinder (four metal balls, 300 strokes/min for 1 min). The obtained crude  
220 extracts were centrifuged for 5 min at  $10\,000 \times g$  and 4 °C. The supernatants were filtered on 0.45  $\mu m$   
221 filters and immediately processed for absorption and MS analyses. All steps were performed, as much  
222 as possible, in darkness at 4 °C. The overall extraction procedure took less than 20 min.

### 223 2.7.2 Chromatographic profile

224 The chromatographic profile of housefly eyes that includes L-tryptophan, xanthurenic acid, 3-D,L-  
225 hydroxykynurenine, uncyclized xanthommatin, xanthommatin and decarboxylated xanthommatin is

## *Uncyclized xanthommatin in ommochrome biosynthesis*

226 reported based on their optimized MRM signals. L-Tryptophan and xanthurenic acid were quantified  
227 based on their optimized MRM signals:  $[M+H]^+$  205>118  $m/z$  (CV 26 V and CE 25 eV) and  $[M+H]^+$   
228 206>132  $m/z$  (CV 36 V and CE 28 eV), respectively. See Fig S2 for detailed information on MS/MS  
229 optimization. 3-D,L-Hydroxykynurenine and uncyclized xanthommatin were quantified based on their  
230 absorption at 370 and 430 nm, respectively. L-Tryptophan, 3-D,L-hydroxykynurenine and xanthurenic  
231 acid levels were converted to molar concentrations using calibrated curves of commercial standards.  
232 Molar concentrations of uncyclized xanthommatin are reported as cinnabarinic equivalent, since both  
233 metabolites possess the same chromophore and presented similar absorbance spectra (see Fig 5C).

## 234 **2.8 Purification and content analysis of ommochromasomes**

### 235 *2.8.1 Isolation buffers*

236 Ommochromasomes from housefly eyes were purified as previously described (Cölln et al., 1981),  
237 with some modifications. Isolation buffer (IB) was prepared with 10 mM Tris, 1 mM  $MgCl_2$ , 25 mM  
238 KCl and 14 mM  $\beta$ -mercaptoethanol in distilled water. The pH was brought to 7.0 with 1 M HCl.  
239 Isolation buffer with sucrose (IB sucrose) was prepared by adding 0.25 M sucrose to IB. IB and IB  
240 sucrose were kept at 4 °C no longer than a day to avoid  $\beta$ -mercaptoethanol degradation (Stevens et al.,  
241 1983). All steps of the purification procedure were performed at 4 °C.

### 242 *2.8.2 Homogenization of housefly eyes*

243 A total of 416 fresh housefly heads were homogenized in 12 mL of IB sucrose with a glass potter  
244 Elvehjem homogenizer. The suspension was filtered on gauze and the filtrate recovered. The potter  
245 was rinsed with 6 mL of IB sucrose, filtered and the filtrate recovered.

### 246 *2.8.3 Differential centrifugation*

247 The two filtrates were combined and centrifuged for 2 min at  $400 \times g$ . The supernatant was recovered.  
248 The pellet was resuspended in 6 mL IB sucrose, centrifuged for 2 min at  $400 \times g$  and the supernatant  
249 recovered. The supernatants were combined and centrifuged for 5 min at  $180 \times g$ . The supernatant was  
250 recovered and centrifuged for 12 min at  $10\,000 \times g$ . The obtained pellet was stored overnight at 4 °C.

### *Uncyclized xanthommatin in ommochrome biosynthesis*

251 To limit membrane destabilization and loss of pigments by the action of detergents, the pellet was only  
252 resuspended in 12 mL IB sucrose with 30  $\mu$ L Triton X-100 immediately before ultracentrifugation.  
253 The suspension containing Triton X-100 was further centrifuged for 1 min at  $100 \times g$  and the  
254 supernatant recovered.

#### 255 *2.8.4 Ultracentrifugation*

256 The supernatant was layered onto two discontinuous gradients of (from bottom to top): 2.5 M, 2.25 M,  
257 2 M, 1.75 M, 1.5 M, 1.25 M and 1 M sucrose in IB. The tubes were ultracentrifuged for 45 min at 175  
258 000  $\times g$  in a Beckman LE-70 ultracentrifuge with a SW32 rotor. The obtained pellets were  
259 resuspended in 3 mL of IB sucrose, combined and layered onto a discontinuous gradient of (from  
260 bottom to top): 0.99 M, 0.83 M and 0.73 M Nycodenz® (iohexol) in IB. The tube was ultracentrifuged  
261 for 2 h 40 at 175 000  $\times g$  with a SW41Ti rotor. Purified ommochromasomes were recovered from the  
262 0.83 M layer (corresponding density around 1.4) and centrifuged for 10 min at 23 000  $\times g$ . The  
263 obtained pellet was rinsed with IB sucrose, resuspended in 1 mL IB sucrose and fractionated into 0.1  
264 mL aliquots. Those aliquots were centrifuged for 20 min at 12 000  $\times g$ . The supernatants were  
265 discarded and one pellet was directly processed for electron microscopy to check for the absence of  
266 membrane contaminants and other organelles, particularly mitochondria and lysosomes (Fig 6A). The  
267 remaining obtained pellets of purified ommochromasomes were stored at  $-20^\circ\text{C}$  until further use.

#### 268 *2.8.5 Extraction of ommochrome-related metabolites from purified ommochromasomes*

269 Pellets ( $n = 5$ ) were resuspended in 50  $\mu$ L MeOH-HCl and directly subjected to UPLC-DAD-ESI-  
270 MS/MS analysis. All steps were performed, as much as possible, in darkness and at  $4^\circ\text{C}$ . The overall  
271 extraction procedure took less than 2 min per sample.

#### 272 *2.8.6 Metabolic analysis of purified ommochromasomes*

273 The chromatographic profile of purified ommochromasomes that includes L-tryptophan, xanthurenic  
274 acid, 3-D,L-hydroxykynurenine, uncyclized xanthommatin, xanthommatin, decarboxylated  
275 xanthommatin and  $\beta$ -mercaptoethanol-added ommatins is reported based on their optimized MRM

276 signals. L-Tryptophan, 3-D,L-hydroxykynurenine, xanthurenic acid and uncyclized xanthommatin  
277 were quantified as described for crude extracts of housefly eyes.

## 278 **2.9 Statistical analysis**

279 Statistical analyses were performed using the R software, version 3.4.1 ([www.r-project.org](http://www.r-project.org)). Statistical  
280 threshold was set to 0.05. Statistical analyses are briefly described in the captions of Fig 4 and Fig 5,  
281 and detailed results are reported in File S2

## 282 **3. Results**

### 283 **3.1 UPLC-DAD-MS/MS structural elucidation of synthesized xanthommatin and** 284 **its in vitro derivatives**

285 Since xanthommatin is commercially unavailable, we achieved its *in vitro* synthesis by oxidative  
286 condensation of 3-hydroxykynurenine under anoxia as previously reported (Butenandt et al., 1954).  
287 <sup>1</sup>H-NMR spectroscopy on the product validated that the main synthesized compound was  
288 xanthommatin (see Material and Methods and Fig S1) (Williams et al., 2019a). The synthesized  
289 product was then solubilized in methanol acidified with 0.5 % HCl (MeOH-HCl) and analyzed by  
290 Liquid Chromatography (LC) coupled to Diode-Array Detection (DAD) and Mass Spectrometry (MS)  
291 (Fig 2). The product was solubilized extemporaneously to avoid any chemical degradation before LC-  
292 DAD-MS analyses (Fig 2A, B). Chromatograms showed two main peaks corresponding to  
293 xanthommatin (retention time [RT]: 11.8 min, [M+H]<sup>+</sup> at *m/z* 424) and decarboxylated xanthommatin  
294 (RT: 9.1 min, [M+H]<sup>+</sup> at *m/z* 380) (Table 1). Two co-eluting peaks were present in trace amounts at  
295 RT 8.5 and 11.9 min and were associated to [M+H]<sup>+</sup> at *m/z* 460 and [M+H]<sup>+</sup> at *m/z* 504, respectively.  
296 The detailed analysis of this sample enabled the detection of a small peak at RT 6.7 min ([M+H]<sup>+</sup> at  
297 *m/z* 443) with its corresponding chromatogram at 430 nm (Fig 2A). A detailed analysis of this  
298 particular compound is presented further in the text.

*Uncyclized xanthommatin in ommochrome biosynthesis*

299 Table 1. Analytical characteristics of ommatin-related compounds found *in vitro* and in biological extracts.

| Annotation<br>(Formula, calculated<br>MW)                                                                                                                                                                           | RT<br>(min) | Absorbance<br>peaks | Monocharged<br>ions<br>( <i>m/z</i> loss)                                                  | Double-charged<br>ions<br>( <i>m/z</i> loss)                | MS/MS fragments<br>( <i>m/z</i> loss)                                                                                                   |
|---------------------------------------------------------------------------------------------------------------------------------------------------------------------------------------------------------------------|-------------|---------------------|--------------------------------------------------------------------------------------------|-------------------------------------------------------------|-----------------------------------------------------------------------------------------------------------------------------------------|
| <i>Detected in synthesized ommatins, crude extracts of housefly eyes and ommochrome extracts</i>                                                                                                                    |             |                     |                                                                                            |                                                             |                                                                                                                                         |
| 3-Hydroxykynurenine<br>(C <sub>10</sub> H <sub>12</sub> N <sub>2</sub> O <sub>4</sub> , 224.21)                                                                                                                     | 1.6         | 231; 264;<br>376    | 224.9 [M+H] <sup>+</sup> ;<br>207.9 (-17); 161.9<br>(-63); 152.0 (-73)                     | Not detected                                                | 207.7 (-17); 161.9 (-<br>63)                                                                                                            |
| Uncyclized xanthommatin<br>(C <sub>20</sub> H <sub>18</sub> N <sub>4</sub> O <sub>8</sub> , 442.38)                                                                                                                 | 6.7         | 235; 420-<br>450    | 442.9 [M+H] <sup>+</sup> ;<br>425.9 (-17); 408.8<br>(-34); 353.0 (-90)                     | 213.6 [M-<br>17+2H] <sup>2+</sup>                           | 425.9 (-17); 409.0 (-<br>34); 390.9 (-52); 363.1<br>(-80); 353.0 (-90);<br>344.9 (-98); 335.1 (-<br>108); 317.0 (-126);<br>307.0 (-136) |
| Xanthommatin<br>(C <sub>20</sub> H <sub>13</sub> N <sub>3</sub> O <sub>8</sub> , 423.33)                                                                                                                            | 11.8        | 234; 442            | 423.9 [M+H] <sup>+</sup> ;<br>406.8 (-17); 377.9<br>(-46); 350.9 (-73)                     | 212.5 [M+2H] <sup>2+</sup> ;<br>189.5 (-23)                 | 406.3 (-17; -18); 360.7<br>(-63); 350.8 (-73);<br>316.8 (-107); 304.8 (-<br>119); 288.9 (-135)                                          |
| Decarboxylated<br>xanthommatin<br>(C <sub>19</sub> H <sub>13</sub> N <sub>3</sub> O <sub>6</sub> , 379.32)                                                                                                          | 9.1         | 234; 442            | 379.9 [M+H] <sup>+</sup> ;<br>362.9 (-17); 333.9<br>(-46); 306.9 (-73)                     | 190.5 [M+2H] <sup>2+</sup> ;<br>167.5 (-23)                 | 362.7 (-17; -18); 333.7<br>(-46); 316.8 (-63);<br>306.8 (-73); 290.9 (-<br>89)                                                          |
| <i>Only detected in synthesized ommatins</i>                                                                                                                                                                        |             |                     |                                                                                            |                                                             |                                                                                                                                         |
| Xanthommatin<br>sulphate/phosphate ester<br>(C <sub>20</sub> H <sub>13</sub> N <sub>3</sub> O <sub>11</sub> S, 503.40;<br>C <sub>20</sub> H <sub>14</sub> N <sub>3</sub> O <sub>11</sub> P, 503.31)                 | 12.4        | 236; 445            | 503.9 [M+H] <sup>+</sup> ;<br>453.6 (-50); 430.5<br>(-73?); 379.8 (-<br>124); 350.7 (-153) | 252.5 [M+2H] <sup>2+</sup> ;<br>229.5 (-23)                 | 487.0 (-17); 440.6 (-<br>63); 430.8 (-73); 422.8<br>(-81); 396.5 (-107?);<br>384.9 (-119)                                               |
| Decarboxylated<br>xanthommatin<br>sulphate/phosphate ester<br>(C <sub>19</sub> H <sub>13</sub> N <sub>3</sub> O <sub>9</sub> S, 459.39;<br>C <sub>19</sub> H <sub>14</sub> N <sub>3</sub> O <sub>9</sub> P, 459.30) | 8.5         | 236; 443            | 459.8 [M+H] <sup>+</sup> ;<br>442.8 (-17); 413.8<br>(-46); 386.7 (-73)                     | 230.4 [M+2H] <sup>2+</sup> ;<br>207.4 (-23)                 | 442.8 (-17); 413.7 (-<br>46); 396.8 (-63); 386.8<br>(-73)                                                                               |
| <i>Detected in synthesized ommatins incubated in MeOH-HCl in darkness</i>                                                                                                                                           |             |                     |                                                                                            |                                                             |                                                                                                                                         |
| α <sup>3</sup> -Methoxy-xanthommatin<br>(C <sub>21</sub> H <sub>15</sub> N <sub>3</sub> O <sub>8</sub> , 437.36)                                                                                                    | 12.6        | 217; 303;<br>452    | 437.9 [M+H] <sup>+</sup> ;<br>420.9 (-17); 391.9<br>(-46); 364.9 (-73)                     | 219.4 [M+2H] <sup>2+</sup> ;<br>196.5 (-23)                 | 420.7 (-17); 391.8 (-<br>46); 374.8 (-63); 364.8<br>(-73); 314.8 (-123);<br>304.8 (-133)                                                |
| α <sup>3</sup> , α <sup>11</sup> -Dimethoxy-<br>xanthommatin<br>(C <sub>22</sub> H <sub>17</sub> N <sub>3</sub> O <sub>8</sub> , 451.39)                                                                            | 13.0        | 217; 303;<br>452    | 451.9 [M+H] <sup>+</sup> ;<br>434.9 (-17); 391.9<br>(-60); 364.9 (-87)                     | 226.5 [M+2H] <sup>2+</sup> ;<br>196.4 (-30)                 | 434.9 (-17); 374.8 (-<br>77); 364.9 (-87); 314.8<br>(-137); 304.8 (-147)                                                                |
| Decarboxylated α <sup>11</sup> -<br>methoxy-xanthommatin<br>(C <sub>20</sub> H <sub>15</sub> N <sub>3</sub> O <sub>6</sub> , 393.35)                                                                                | 10.1        | 234; 442            | 393.9 [M+H] <sup>+</sup> ;<br>376.9 (-17); 333.9<br>(-60); 307.0 (-87)                     | 197.6 [M+2H] <sup>2+</sup> ;<br>167.4 (-30)                 | 376.7 (-17; -18); 333.8<br>(-60); 316.8 (-77);<br>306.9 (-87); 290.9 (-<br>105)                                                         |
| Unknown altered<br>xanthommatin (455)                                                                                                                                                                               | 14.4        | 242; 442            | 455.9 [M+H] <sup>+</sup>                                                                   | 228.4 [M+2H] <sup>2+</sup> ;<br>205.4 (-23)                 | 340.1 (-116); 324.6 (-<br>131?); 295.0 (-161);<br>205.2 (-251)                                                                          |
| Unknown altered methoxy-<br>xanthommatin (469)                                                                                                                                                                      | 14.9        | 243; 390;<br>452    | 469.8 [M+H] <sup>+</sup>                                                                   | 235.5 [M+2H] <sup>2+</sup> ;<br>212.4 (-23)                 | 353.7 (-116); 338.8 (-<br>131); 294.7 (-175);<br>204.8 (-265)                                                                           |
| Unknown altered<br>dimethoxy-xanthommatin<br>(483)                                                                                                                                                                  | 15.0        | 242; 388;<br>450    | 484.0 [M+H] <sup>+</sup>                                                                   | 242.5 [M+2H] <sup>2+</sup> ;<br>212.5 (-30)                 | 353.9 (-130); 338.8 (-<br>145); 294.8 (-189);<br>204.9 (-279)                                                                           |
| <i>Detected in synthesized ommatins incubated with β-mercaptoethanol in darkness and in ommochrome extracts</i>                                                                                                     |             |                     |                                                                                            |                                                             |                                                                                                                                         |
| β-mercaptoethanol-added<br>xanthommatin<br>(C <sub>22</sub> H <sub>17</sub> N <sub>3</sub> O <sub>9</sub> S, 499.45)                                                                                                | 11.7        | 238; 415            | 499.9 [M+H] <sup>+</sup> ;<br>426.8 (-73)                                                  | 250.4 [M+2H] <sup>2+</sup> ;<br>227.5 (-23); 218.4<br>(-32) | 482.7 (-17); 464.7 (-<br>35)                                                                                                            |
| β-mercaptoethanol-added<br>decarboxylated<br>xanthommatin<br>(C <sub>21</sub> H <sub>17</sub> N <sub>3</sub> O <sub>7</sub> S, 455.44)                                                                              | 9.1         | 232; 412            | 455.9 [M+H] <sup>+</sup> ;<br>420.0 (-36); 382.8<br>(-73); 343.8 (-112)                    | 228.4 [M+2H] <sup>2+</sup> ;<br>205.4 (-23); 196.5<br>(-32) | 438.8 (-17); 421.0 (-<br>35); 392.7 (-63)                                                                                               |

*Uncyclized xanthommatin in ommochrome biosynthesis*

301 With the aim to produce more ommatins and thus manipulate their molecular structure, we  
302 incubated synthesized ommatins for 24 h in MeOH-HCl at 20 °C in darkness (Fig 2C, D). Based on  
303 previous studies (Bolognese and Liberatore, 1988), we expected ommatins to get methoxylated,  
304 mainly on their carboxylic acid functions. The comparative analysis of Fig 2A, B (2 minutes in  
305 MeOH-HCl) and Fig 2C, D (24 h later) highlights different sets of peaks that appeared or disappeared  
306 over the 24 h of incubation. Three major newly formed compounds were observed at RT 10.1, 12.6  
307 and 13 min corresponding to  $[M+H]^+$  at  $m/z$  394, 438 and 452, respectively. We compared the UV and  
308 MS characteristics of these compounds with those of xanthommatin and decarboxylated  
309 xanthommatin. Absorbance spectra of the five compounds revealed strong similarities, particularly in  
310 the visible region ( $> 400$  nm, Fig 3A) suggesting that these three newly formed molecules shared their  
311 chromophores with xanthommatin and decarboxylated xanthommatin. Mass spectra of the five  
312 compounds also showed strong similarities (Fig 3B). They all experienced an in-source neutral loss of  
313  $-17$   $m/z$  ( $-NH_3$ ) and formed a double-charged molecular ion  $[M+2H]^{2+}$ . 452 and 394  $m/z$ -associated  
314 compounds typically lost 14 units more than xanthommatin and decarboxylated xanthommatin,  
315 respectively, during in-source fragmentation. Additionally, their double-charged fragmentations were  
316 7 units higher than for xanthommatin and decarboxylated xanthommatin ( $= 14/2$ ; Fig 3B). Overall,  
317 gains of 14  $m/z$  in the newly formed compounds compared to xanthommatin and decarboxylated  
318 xanthommatin suggested methylation reactions occurring in acidic methanol.

319 Because we did not succeed in purifying each compound to analyze them separately by NMR  
320 spectroscopy, we subjected the main  $[M+H]^+$  to MS/MS fragmentation and compared it with  
321 previously reported fragmentation patterns of kynurenine, 3-hydroxykynurenine, xanthommatin and  
322 decarboxylated xanthommatin (Guijas et al., 2018; Panettieri et al., 2018; Reiter et al., 2018; Vazquez  
323 et al., 2001; Williams et al., 2016) (<http://metlin.scripps.edu>, METLIN ID: 365). In these molecules,  
324 the main ionization site is the amine function of the amino acid branch, which is also the most  
325 susceptible to fragmentation. For both xanthommatin and decarboxylated xanthommatin, we observed  
326 similar patterns of fragmentation of the amino acid branch with three neutral losses corresponding to -  
327  $NH_3$  ( $-17$   $m/z$ ),  $-CH_3O_2N$  ( $-63$   $m/z$ ) and  $-C_2H_3O_2N$  ( $-73$   $m/z$ ) (Table 1). Those fragmentations have been

*Uncyclized xanthommatin in ommochrome biosynthesis*

328 reported for these two ommatins (Panettieri et al., 2018; Reiter et al., 2018; Williams et al., 2016), as  
329 well as for kynurenines (Vazquez et al., 2001), indicating that they are typical of compounds with a  
330 kynurenine-like amino acid chain. Additionally, two neutral losses corresponding to  $-\text{CO}_2$  ( $-44 m/z$ )  
331 and  $-\text{CH}_2\text{O}_2$  ( $-46 m/z$ ) were observed only for xanthommatin (Fig 3C) due to the presence of the  
332 carboxyl function on the pyridine ring (Fig 3D). We categorized those predictable MS fragments into  
333 different successive fragmentation signatures called  $F_A$  to  $F_E$  (Table 2) and we used them to assign the  
334 structure of unknown ommatins. The fragmentation of  $[\text{M}+\text{H}]^+$   $394 m/z$  showed neutral losses  
335 corresponding to  $-\text{NH}_3$  ( $-17 m/z = F_A$ ),  $-\text{C}_2\text{H}_7\text{O}_2\text{N}$  ( $-77 = -63 -14 m/z = F_A + F_B + F_C - \text{CH}_2$ ) and  
336  $\text{C}_3\text{H}_5\text{O}_2\text{N}$  ( $-87 = -73 -14 m/z = F_A + F_B + F_C + F_D - \text{CH}_2$ ) on the amino acid branch. These results  
337 strongly indicated that, in the  $394 m/z$ -associated compound, the carboxyl function of the amino acid  
338 branch was methoxylated ( $\alpha^{11}$  position). Consequently, this compound was assigned to decarboxylated  
339  $\alpha^{11}$ -methoxy-xanthommatin (Fig 3C). Those conclusions are in accordance with the similar absorbance  
340 spectra of decarboxylated  $\alpha^{11}$ -methoxy-xanthommatin and decarboxylated xanthommatin (Fig 3A), as  
341 the amino acid branch is unlikely to act on near-UV and visible wavelength absorptions of the  
342 chromophore. The fragmentation of  $[\text{M}+\text{H}]^+$   $438 m/z$  showed the xanthommatin-like neutral losses, -  
343  $\text{NH}_3$  ( $-17 m/z = F_A$ ),  $-\text{CH}_5\text{O}_2\text{N}$  ( $-63 m/z = F_A + F_B + F_C$ ) and  $-\text{C}_2\text{H}_3\text{O}_2\text{N}$  ( $-73 m/z = F_A + F_B + F_C + F_D$ ),  
344 highlighting that this compound shared the same unaltered amino acid branch with xanthommatin.  
345 However, this compound experienced the neutral loss  $-\text{C}_2\text{H}_4\text{O}_2$  ( $-60 = -46 -14 m/z = F_E - \text{CH}_2$ ) on the  
346 pyridine ring instead of  $-\text{CH}_2\text{O}_2$  ( $-46 m/z = F_E$ ) (Fig 3C), which strongly indicated a methoxylation on  
347 the pyrido-carboxyl group ( $\alpha^3$  position). This is in accordance with the associated absorbance spectrum  
348 being different from that of xanthommatin, which has a carboxylated chromophore (Fig 3A). Hence,  
349 we proposed that this compound was  $\alpha^3$ -methoxy-xanthommatin (Fig 3D). The  $452 m/z$ -associated  
350 compound showed neutral losses corresponding to  $-\text{NH}_3$  ( $-17 m/z = F_A$ ),  $-\text{C}_2\text{H}_7\text{O}_2\text{N}$  ( $-77 m/z = F_A + F_B$   
351  $+ F_C - \text{CH}_2$ ) and  $-\text{C}_3\text{H}_5\text{O}_2\text{N}$  ( $-87 m/z = F_A + F_B + F_C + F_D - \text{CH}_2$ ) on the amino acid branch and  $-\text{C}_2\text{H}_4\text{O}_2$   
352 ( $-60 m/z = F_D - \text{CH}_2$ ) on the pyridine ring, which strongly indicated methoxylations on both pyridine  
353 ring and amino acid branch in positions  $\alpha^3$  and  $\alpha^{11}$ , respectively. This is in accordance with the  
354 associated absorbance spectrum being similar to that of  $\alpha^3$ -methoxy-xanthommatin, which has a

*Uncyclized xanthommatin in ommochrome biosynthesis*

355 methoxylated chromophore. Thus, we proposed this compound to be  $\alpha^3, \alpha^{11}$ -dimethoxy-xanthommatin  
356 (Fig 3D). Overall, such positions of methoxylation agree well with the reactivity of ommatins in  
357 MeOH-HCl (Bolognese and Liberatore, 1988).

358 Table 2. **Diagnostic neutral losses of ommatins.**

| Annotation     | Fragmented structure | Neutral loss       | <i>m/z</i> loss |
|----------------|----------------------|--------------------|-----------------|
| F <sub>A</sub> | Amino acid           | -NH <sub>3</sub>   | -17             |
| F <sub>B</sub> | Amino acid           | -H <sub>2</sub> O  | -18             |
| F <sub>C</sub> | Amino acid           | -CO                | -28             |
| F <sub>D</sub> | Amino acid           | -C+2H              | -10             |
| F <sub>E</sub> | Pyridine ring        | -CO <sub>2</sub> H | -46             |

359

360 Using the same DAD-MS combination approaches, we annotated other ommatin-like  
361 compounds produced during *in vitro* synthesis and after incubation in MeOH-HCl (Table 1). The 504  
362 and 460 *m/z*-associated compounds differed from xanthommatin and decarboxylated xanthommatin by  
363 80 Da, respectively. The associated double-charged ions  $[M+2H]^{2+}$  and  $[M-CH_2O_2+2H]^{2+}$  accordingly  
364 differed by 40 *m/z* from those of xanthommatin and decarboxylated xanthommatin, respectively. Their  
365 absorbance spectra were identical to the two ommatins. Their MS and MS/MS spectra revealed  
366 identical losses to xanthommatin and decarboxylated xanthommatin: -NH<sub>3</sub> (-17 *m/z* = F<sub>A</sub>), -CH<sub>2</sub>O<sub>2</sub> (-  
367 46 *m/z* = F<sub>D</sub>), -CH<sub>3</sub>O<sub>2</sub>N (-63 *m/z* = F<sub>A</sub> + F<sub>B</sub> + F<sub>C</sub>) and -C<sub>2</sub>H<sub>3</sub>O<sub>2</sub>N (-73 *m/z* = F<sub>A</sub> + F<sub>B</sub> + F<sub>C</sub> + F<sub>D</sub>; see  
368 Table 2). Furthermore, the  $[M+H]^+$  504 *m/z* experienced the same neutral losses -C<sub>2</sub>H<sub>5</sub>O<sub>4</sub>N (-107 *m/z*)  
369 and -C<sub>3</sub>H<sub>5</sub>O<sub>4</sub>N (-119 *m/z*) than xanthommatin. Alternatively, the  $[M+H]^+$  504 *m/z* experienced a  
370 unique in-source neutral loss of -153 *m/z* that could correspond to -C<sub>2</sub>H<sub>3</sub>O<sub>5</sub>NS or -C<sub>2</sub>H<sub>4</sub>O<sub>5</sub>NP (-73 -80  
371 *m/z*). All those results suggested that the 504 and 460 *m/z*-associated compounds were sulphate or  
372 phosphate esters of xanthommatin and decarboxylated xanthommatin, respectively. This in accordance  
373 with the use of phosphate buffer for the *in vitro* synthesis and of sulfurous acid to precipitate  
374 ommatins. To our knowledge, these two esters have never been described. Finally, during the  
375 incubation in MeOH-HCl, minor ommatin-like compounds (classified as ommatins based on their



*Uncyclized xanthommatin in ommochrome biosynthesis*

376 absorbance and the presence of double-charged ions) were formed and were associated to the 456, 470  
377 and 484  $m/z$  (Table 1). The differences of 14 units of their respective molecular ion  $m/z$ , as well as  
378 their neutral losses in MS/MS being either similar or differing by 14 units, indicated that they were  
379 methylated versions of each other. However, due to their very low amounts, we could not  
380 unambiguously propose a structure.

381 These results showed that, in storage conditions mimicking extraction procedures with MeOH-  
382 HCl, xanthommatin and its decarboxylated form are methoxylated, even in darkness. Those reactions  
383 are likely to result from solvent additions with acidified MeOH-HCl (the most efficient solvent for  
384 ommatin extraction). To further characterize the importance of those artifactitious reactions, we  
385 followed the kinetic of the five ommatins described in Fig 3D in MeOH-HCl at 20 °C and in darkness.

386 **3.2 The ommatin profile is rapidly and readily modified overtime by**  
387 **artifactitious methoxylations in acidified methanol**

388 Because absorbance spectra of all five considered compounds did not differ significantly and because  
389 some of them were co-eluted (Fig 2), their detection and quantification were performed by MS/MS in  
390 multiple reaction monitoring (MRM) mode. MRM conditions were independently optimized for each  
391 compound based on the fragmentation of their amino acid branch (Fig S2).

392 The MRM signal of xanthommatin rapidly decreased overtime in a linear fashion, with a near  
393 40 % reduction after only one day of incubation (Fig 4A). On the contrary, the MRM kinetics of  $\alpha^3$ -  
394 methoxy-xanthommatin had a logarithmic-shape, sharply increasing during the first day before  
395 reaching a plateau during the two following days (Fig 4B). Both decarboxylated  $\alpha^{11}$ -methoxy-  
396 xanthommatin and  $\alpha^3, \alpha^{11}$ -dimethoxy-xanthommatin appeared after a few hours of incubation. Their  
397 MRM signal then linearly increased overtime (Fig 4C, E). In parallel, the MRM signal of  
398 decarboxylated xanthommatin stayed nearly constant, with only a small increase by 1.13 % over the  
399 five first hours (Fig 4D). Those results further validate that xanthommatin was readily methoxylated in  
400 darkness, primarily in position  $\alpha^3$ . A slower methoxylation on the amino acid branch could account for  
401 the delay in the appearance of the two other methoxylated forms. The levels of decarboxylated

*Uncyclized xanthommatin in ommochrome biosynthesis*

402 xanthommatin did not vary much overtime although its methoxycarbonyl ester was produced (Fig 4D,  
403 E). This result could be explained by the concomitant and competitive slow decarboxylation of  
404 xanthommatin, a reaction that has already been described in MeOH-HCl upon light radiations  
405 (Bolognese et al., 1988b).

406 Because we cannot compare MRM signal intensities of different molecules, we took benefit of  
407 their similar absorption in the visible region, especially at 414 nm (Fig 3A, Fig S3), to quantify their  
408 relative amounts. Although less sensitive and less specific than MRM-based detection, the absorbance  
409 at 414 nm strongly indicated that, after only one day of incubation, one third of ommatins was  
410 methoxylated (Fig 4F). Most of the methoxylated ommatins accumulated during the first 24 hours (Fig  
411 4B). As expected, rates of methoxylation were significantly decreased by incubating synthesized  
412 ommatins in MeOH-HCl at -20 °C (Fig S4A, B). After storage of a month at -20 °C, the methoxylated  
413 ommatins represented nearly 1.2 % of ommatins (Fig S4C).

414 To conclude, our results showed that decarboxylated xanthommatin was mostly stable in  
415 MeOH-HCl. By contrast, xanthommatin was rapidly converted into methoxylated derivatives. Since,  
416 MeOH-HCl is the most efficient solvent for ommatin extraction, the conditions for extraction and  
417 analysis of ommatins from biological samples should avoid wherever possible the formation of  
418 artifactitious methoxylated ommatins.

419 ***3.3 UPLC-DAD-MS/MS structural elucidation of uncyclized xanthommatin, the***  
420 ***labile intermediate in the synthesis of ommatins from 3-hydroxykynurenine***

421 The *in vitro* synthesis of xanthommatin by oxidizing 3-hydroxykynurenine additionally yielded a  
422 minor compound at RT 6.7 min. It was characterized by a peak of absorbance at 430 nm and was  
423 associated to the 443 *m/z* feature (Fig 2A, B). Upon solubilization in MeOH-HCl, the unidentified  
424 compound was labile and disappeared after the 24h-incubation at 20 °C in darkness (Fig 2C, D). A  
425 similar 443 *m/z* feature was described two decades ago during oxidations of 3-hydroxykynurenine in  
426 various conditions (Iwahashi and Ishii, 1997). Based on its MS spectrum, it was assigned putatively to  
427 the 3-hydroxykynurenine dimer called uncyclized xanthommatin. However, there was a lack of

*Uncyclized xanthommatin in ommochrome biosynthesis*

428 analytical evidence to support its structural elucidation. No study has ever since reported the presence  
429 of uncyclized xanthommatin, either *in vitro* or *in vivo*. Because this compound could be an important  
430 biological intermediate in the formation of ommatins (Bolognese et al., 1988b; Iwahashi and Ishii,  
431 1997), we further characterized its structure based on its chemical behavior, absorbance and  
432 fragmentation pattern. We note that the apparent lability and the very low amounts of this unidentified  
433 product precluded its characterization by NMR spectroscopy.

434 The absorbance and MS kinetics of the unidentified synthesized compound showed that it was  
435 very labile (insets of Fig 5A, B). Indeed, we could not detect it after a week of storage at -20 °C  
436 anymore. This behavior resembled that of a photosensitive ommatin-like isolated 40 years ago from  
437 several invertebrates, which rapidly turned into xanthommatin after extraction (Bolognese and  
438 Scherillo, 1974). The absorbance spectrum of this unidentified compound matched almost exactly the  
439 UV-Visible spectrum of cinnabarinic acid measured in the same conditions (Fig 5C), and both are  
440 similar to those reported for actinomycin D and 2-amino-phenoxazin-3-one (Nakazawa et al., 1981).  
441 This result indicated that this compound contained the amino-phenoxazinone chromophore rather than  
442 the pyrido[3,2-*a*]phenoxazinone scaffold of ommatins or the *ortho*-aminophenol core of 3-  
443 hydroxykynurenine. Furthermore, its ionization pattern revealed striking similarities with ommatins.  
444 Along with the molecular ion  $[M+H]^+$  at 443 *m/z* (corresponding to MW 442 and to the formula  
445  $C_{20}H_{18}N_4O_8$ ), we detected the double-charged ion  $[M-NH_3+2H]^{2+}$  at 213.6 *m/z* (Fig 5D). We then  
446 targeted the molecular ion for MS/MS to compare the obtained fragments with those reported above  
447 (Table 2). If the compound was uncyclized xanthommatin, we predicted that F<sub>A</sub>, F<sub>B</sub>, F<sub>C</sub> and F<sub>D</sub> would  
448 appear each twice, because uncyclized xanthommatin possesses two 3-hydroxykynurenine-like amino  
449 acid chains. Only F<sub>E</sub> should be absent, because no aromatic carboxylic acid exist in uncyclized  
450 xanthommatin. Indeed, from two MS<sup>2</sup> spectra obtained at different collision energies, we could assign  
451 each F<sub>X</sub> twice and we did not find any fragmentation event corresponding to F<sub>E</sub>. Hence, by starting  
452 from the amino-phenoxazinone backbone suggested by the UV-Visible spectrum, the uncyclized form  
453 of xanthommatin could be reconstructed after adding each F<sub>Xx</sub> successively (Fig 5F).

*Uncyclized xanthommatin in ommochrome biosynthesis*

454 All these analytical characteristics strongly supported that this labile compound was the  
455 phenoxazinone dimer of 3-hydroxykynurenine (Fig 5G), called uncyclized xanthommatin (Figon and  
456 Casas, 2019). This structural assignment was further supported by the two following chemical  
457 behaviors. First, the oxidation of an *ortho*-aminophenol (here 3-hydroxykynurenine) by potassium  
458 ferricyanide is known to induce its dimerization through the loss of six electrons and protons (here 2x  
459  $MW_{3\text{-hydroxykynurenine}} [224 \text{ Da}] - 6 \text{ Da} = MW_{\text{dimer}} [442 \text{ Da}] = MW_{\text{Uncyclized xanthommatin}}$ ). Second, the  
460 spontaneous intramolecular cyclization involving the amine functions of the amino-phenoxazinone  
461 core and the closest amino acid branch could explain the lability of uncyclized xanthommatin in cold  
462 MeOH-HCl (insets of Fig 5A, B) (Williams et al., 2019a), as well as the formation of a major double-  
463 charged ion corresponding to that of the reduced form of xanthommatin (dihydroxanthommatin; Fig  
464 5G and Fig S5). In conclusion, we have now the tools to identify uncyclized xanthommatin in other  
465 samples, particularly biological materials.

466 **3.4 Biological localization of the metabolites from the**  
467 **tryptophan  $\rightarrow$  ommochrome pathway**

468 Using our chemical and analytical knowledge of synthesized ommatins, we reinvestigated the content  
469 of housefly eyes in ommochromes and their related metabolites. We chose this species because it is  
470 known to accumulate xanthommatin and some metabolites of the kynurenine pathway in its eyes  
471 (Linzen, 1974). However, nothing is known about decarboxylated xanthommatin and uncyclized  
472 xanthommatin because they were recently described [(Figon and Casas, 2019) and this study], even  
473 though the presence of uncyclized xanthommatin has been suspected (Bolognese and Scherillo, 1974).  
474 Furthermore, a protocol to extract and purify ommochromosomes from housefly eyes is available  
475 (Cölln et al., 1981), thus we can address the question of the localization of the metabolites from the  
476 tryptophan  $\rightarrow$  ommochrome pathway. Finally, we designed an extraction protocol in which all steps  
477 were performed in darkness, at low temperature and in less than half an hour. In those conditions, we  
478 were confident that artifactitious methoxylated ommatins would represent less than one percent of all  
479 ommatins and that we could still detect uncyclized xanthommatin.

*Uncyclized xanthommatin in ommochrome biosynthesis*

480 Based on MRM signals, we detected in methanolic extractions of housefly eyes (called crude  
481 extracts; Fig 6A) the following metabolites of the tryptophan→ommochrome pathway: tryptophan, 3-  
482 hydroxykynurenine, xanthurenic acid, xanthommatin, decarboxylated xanthommatin and uncyclized  
483 xanthommatin (Fig 6B, Table 1). We ascertained the identification of uncyclized xanthommatin by  
484 acquiring its absorbance, MS and MS/MS spectra in biological samples. They showed the same  
485 features than synthesized uncyclized xanthommatin (Fig S6).

486 We then purified ommochromasomes from housefly eyes by a combination of differential  
487 centrifugation and ultracentrifugation, and we compared the extracted compounds with those of crude  
488 extracts (Fig 6A). The main metabolites of ommochromasomes were xanthommatin and its  
489 decarboxylated form (Fig 6D), in accordance to the function of ommochromasomes as ommochrome  
490 factories (Figon and Casas, 2019). Based on the absorbance at 414 nm, decarboxylated xanthommatin  
491 represented  $5.3 \pm 0.1$  % (mean  $\pm$  SD, n = 5) of all ommatins detected in extracts of  
492 ommochromasomes. In comparison, decarboxylated ommatins represented  $21.5 \pm 0.2$  % (mean  $\pm$  SD,  
493 n = 10) of all ommatins synthesized *in vitro*, a percentage four times higher than in methanolic extracts  
494 of purified ommochromasomes (Welch two sample *t*-test,  $t = 219.99$ ,  $df = 12.499$ ,  $p\text{-value} < 2.2e^{-16}$ ).  
495 Regarding the precursors of ommochromes in housefly eyes, we could only detect tryptophan and 3-  
496 hydroxykynurenine but not the intermediary kynurenine. Tryptophan remained undetectable in  
497 extracts of ommochromasomes (Fig 6D). Xanthurenic acid, the product of 3-hydroxykynurenine  
498 transamination, was particularly present in crude extracts of housefly eyes but much less in  
499 ommochromasomes relatively to 3-hydroxykynurenine (Fig 6C vs. Fig 6E). We also detected the  
500 uncyclized form of xanthommatin in ommochromasomes (Fig 6D). Its level was similar to that of the  
501 more stable xanthurenic acid and was enriched relatively to 3-hydroxykynurenine in  
502 ommochromasomes compared to crude extracts (Fig 6C vs. Fig 6E).

503 We detected in ommochromasomes two minor ommatin-like compounds associated to the  
504 molecular ions 500 and 456  $m/z$  (Table 1), which co-eluted with xanthommatin and its decarboxylated  
505 form, respectively (Fig 6D). Both unknown compounds were undetectable in crude extracts of

506 housefly eyes. Their associated  $m/z$  features differed from those of xanthommatin and decarboxylated  
507 xanthommatin by 76 units, respectively (Table 1). Because the isolation buffer used for  
508 ommochromasome purifications contained  $\beta$ -mercaptoethanol (MW 78 Da), we tested whether those  
509 unknown ommatins could be produced by incubating synthesized ommatins with  $\beta$ -mercaptoethanol  
510 in a water-based buffer. We did find that 456 and 500  $m/z$ -associated compounds were rapidly formed  
511 in those *in vitro* conditions and that their retention times matched those detected in ommochromasome  
512 extracts (Fig S7). Therefore, the 456 and 500  $m/z$ -associated ommatins detected in ommochromasome  
513 extracts were likely artifacts arising from the purification procedure via the addition of  $\beta$ -  
514 mercaptoethanol. These results further demonstrate that ommochromes are likely to be altered during  
515 extraction and purification procedures, a chemical behavior that should be controlled by using  
516 synthesized ommochromes incubated in similar conditions than biological samples.

## 517 **4. Discussion**

### 518 **4.1 UPLC-DAD-MS/MS structural elucidation of new ommatins**

519 Biological ommochromes are difficult compounds to analyze by NMR spectroscopy  
520 (Bolognese et al., 1988b). Only xanthommatin, the most common and studied ommochrome, has been  
521 successfully subjected to  $^1\text{H-NMR}$  (although no  $^{13}\text{C-}$  and  $2\text{D-NMR}$  data exist to date, to the best of our  
522 knowledge) (Kumar et al., 2018; Williams et al., 2019a). The NMR-assisted structural elucidation of  
523 unknown ommochromes remains therefore extremely challenging and deceptively difficult. To tackle  
524 this structural problem, we used a combination of absorption and mass spectroscopies, which offer  
525 high sensitivities and orthogonal information, after separation by liquid chromatography. We report  
526 here the most comprehensive analytical dataset to date of ommatins, based on their absorbance, mass  
527 and tandem mass spectra (Table 1). This dataset allowed us to elucidate with strong confidence the  
528 structure of four new ommochromes, including three methoxylated forms and one labile biological  
529 intermediate, and to propose structures for eight new other ommatins.

*Uncyclized xanthommatin in ommochrome biosynthesis*

530 Studies reporting the MS/MS spectra of ommatins demonstrated that they primarily fragment  
531 on their amino acid chain (Williams et al., 2016) and then on the pyrido-carboxylic acid, if present  
532 (Panettieri et al., 2018). We confirmed those results for other ommatins, which indicates that  
533 ommatins fragment in a predictable way despite being highly aromatic compounds. We took a step  
534 further by positioning methoxylations based on the differences in fragmentation between  
535 methoxylated ommatins and (decarboxylated) xanthommatin. Besides, xanthommatin not only formed  
536 a 307  $m/z$  fragment but also a major 305  $m/z$  fragment (Fig 3C; Table 1). This sole fragment was used  
537 in a previous study to annotate a putative new ommochrome called (iso-)elymniommatin, an isomer of  
538 xanthommatin (Panettieri et al., 2018). Our results prove that MS/MS spectra cannot distinguish (iso-  
539 )elymniommatin and xanthommatin unambiguously. The use of synthesized ommatins and further  
540 experiments are thus needed to verify the existence of (iso-)elymniommatin in butterfly wings.

541 Overall, this analytical dataset will help future studies to identify known biosynthesized and  
542 artifactitious ommatins in biological samples, as well as to elucidate the structure of unknown  
543 ommatins by analyzing their absorbance and mass spectra in the absence of NMR data. Furthermore, it  
544 is now possible to look for uncyclized xanthommatin in a wide variety of species.

545 **4.2 Biological extracts are prone to yield artifactitious ommatins**

546 It has long been reported that ommatins are photosensitive compounds that react with acidified  
547 methanol (MeOH-HCl) upon light radiation, leading to their reduction, methylation, methoxylation,  
548 decarboxylation and deamination (Bolognese et al., 1988c, 1988d; Bolognese and Liberatore, 1988;  
549 Figon and Casas, 2019). Nevertheless, incubating tissues in MeOH-HCl for several hours at room  
550 temperature has been commonly used to extract ommatins from biological samples efficiently  
551 (Bolognese et al., 1988a; Riou and Christidès, 2010; Zhang et al., 2017). Our results demonstrate that,  
552 even in the absence of light radiation, ommatins are readily and rapidly methoxylated by thermal  
553 additions of methanol, primarily on the carboxylic acid function of the pyridine ring and secondarily  
554 on the amino acid chain (Fig 7). The  $[M+H]^+$  438  $m/z$  of  $\alpha^3$ -methoxy-xanthommatin identified in our  
555 study could correspond to the same  $[M+H]^+$  previously reported in extracts of butterfly wings

556 (Panettieri et al., 2018). Hence, artifactitious methoxylations during extraction should first be ruled out  
557 before assigning methoxylated ommatins to a new biosynthetic pathway. We also show that ommatins  
558 react with other extraction buffers since we detected  $\beta$ -mercaptoethanol-added ommatins when  
559 synthesized ommatins were incubated in a phosphate buffer containing that reducing agent. Overall,  
560 these results emphasize the need to control for potential artifactitious reactions when performing any  
561 extraction or purification protocol of biological ommochromes.

### 562 **4.3 The metabolites of the tryptophan $\rightarrow$ ommochrome pathway in** 563 **ommochromasomes**

564 It has long been hypothesized that precursors of ommochromes are translocated within  
565 ommochromasomes by the transmembrane ABC transporters White and Scarlet (Ewart et al., 1994;  
566 Mackenzie et al., 2000). Here, we clearly demonstrate that 3-hydroxykynurenine, but not tryptophan,  
567 occurs in ommochromasome fractions of housefly eyes, confirming that 3-hydroxykynurine is the  
568 precursor imported into ommochromasomes by White and Scarlet transporters (Fig 8).

569 Our results confirm that xanthommatin is the main ommatin in ommochromasomes of  
570 housefly eyes. We also showed that decarboxylated xanthommatin was present in significant amounts,  
571 which could not be solely due to the slow decarboxylation of xanthommatin in MeOH-HCl. This result  
572 indicates that both xanthommatin and its decarboxylated form are produced from 3-  
573 hydroxykynurenine within ommochromasomes (Fig 8). We also detected xanthurenic acid, the  
574 cyclized form of 3-hydroxykynurenine, in housefly eyes. Compared to 3-hydroxykynurenine,  
575 xanthurenic acid was present in minute amounts within ommochromasomes. We hypothesize that  
576 xanthurenic acid is produced within ommochromasomes via two non-exclusive pathways (Fig 8). The  
577 first route is the *in situ* intramolecular cyclization of 3-hydroxykynurenine, which requires a cytosolic  
578 transaminase activity (HKT; Fig 8) (Han et al., 2007). The second route is the degradation of  
579 xanthommatin that would produce 3-hydroxykynurenine and xanthurenic acid. The phenoxazinone  
580 structure of ommatins is indeed known to undergo ring-cleavage, particularly in slightly basic water-  
581 based buffers (Butenandt and Schäfer, 1962). Hence, traces of xanthurenic acid might either come



*Uncyclized xanthommatin in ommochrome biosynthesis*

582 from degradation during the purification protocol or from biological changes in ommochromasome  
583 conditions (enzymatic activities or basification) leading to the cleavage of xanthommatin. To the best  
584 of our knowledge, no biological pathways for the degradation of the pyrido-phenoxazinone structure  
585 of ommatins have been described. The detection of xanthurenic acid in ommochromasomes might  
586 therefore be the first step towards understanding the *in situ* catabolism of ommatins (Fig 8).

587 Experimental and computational chemists have long hypothesized that the pyrido[3,2-  
588 *a*]phenoxazinone structure of ommatins should be synthesized *in vivo* by the dimerization of 3-  
589 hydroxykynurenine and a subsequent spontaneous intramolecular cyclization (Butenandt, 1957;  
590 Zhuravlev et al., 2018). However, the associated dimer of 3-hydroxykynurenine, called uncyclized  
591 xanthommatin, proved to be difficult to characterize and to isolate from biological samples because of  
592 its lability (Bolognese and Scherillo, 1974). In our study, we synthesized uncyclized xanthommatin by  
593 the oxidative condensation of 3-hydroxykynurenine with potassium ferricyanide, an oxidant known to  
594 form amino-phenoxazinones from *ortho*-aminophenols (Bolognese and Scherillo, 1974). We used a  
595 combination of kinetics and analytical spectroscopy (DAD, MS and MS/MS) to confirm the *in vitro*  
596 and biological occurrence of uncyclized xanthommatin. Because we detected xanthommatin, its  
597 decarboxylated form, their precursor 3-hydroxykynurenine and the intermediary uncyclized  
598 xanthommatin in both *in vitro* and biological samples, we argue that the *in vitro* synthesis and the  
599 biosynthesis of ommatins proceed through a similar mechanism (compare Fig 7 and Fig 8). An  
600 alternative biosynthetic pathway for ommatins has been proposed to occur through the condensation of  
601 3-hydroxykynurenine with xanthurenic acid (hypothesis 2, Fig 1B) (Linzen, 1974; Panettieri et al.,  
602 2018). However, our data do not support this hypothesis because xanthurenic acid, which is a stable  
603 compound unlike uncyclized xanthommatin, was present in minute amounts within  
604 ommochromasomes compared to 3-hydroxykynurenine, with which it would condensate. At the very  
605 least, our results show that xanthurenic acid is tightly linked to the ommochrome pathway and  
606 therefore cannot be considered as a marker of a distinct biogenic pathway. Lastly, as far as we know,  
607 there has been no experimental evidence for the formation of xanthommatin by condensing 3-  
608 hydroxykynurenine with xanthurenic acid. In conclusion, the formation of uncyclized xanthommatin

*Uncyclized xanthommatin in ommochrome biosynthesis*

609 by the oxidative dimerization of 3-hydroxykynurenine is likely to be the main biological route for the  
610 biosynthesis of ommatins within ommochromosomes (Fig 8; see Supplemental File S3 for a discussion  
611 on the putative enzymatic activity involved in uncyclized xanthommatin formation).

612 **4.4 Uncyclized xanthommatin is a potential key branching point in the**  
613 **biogenesis of ommatins and ommins**

614 The relatively recent description of decarboxylated xanthommatin in several species indicates that it is  
615 a common biological ommatin (Figon and Casas, 2019). Yet, little is known about how  
616 decarboxylation of ommatins proceeds *in vivo*. In this study, we show that decarboxylated  
617 xanthommatin is unlikely to arise solely from the artifactitious decarboxylation of xanthommatin in  
618 MeOH-HCl, and that the level of decarboxylated xanthommatin is lower in biological extracts (5.3 %)  
619 than *in vitro* (21.5 %). Several biological mechanisms could account for the biosynthesis of  
620 decarboxylated xanthommatin but we only discuss the one in direct connection with uncyclized  
621 xanthommatin (but see Fig 8 and Supplemental File S3 for a discussion of the others). Bolognese and  
622 colleagues proposed that decarboxylation happens by a rearrangement of protons, consecutively to the  
623 intramolecular cyclization of uncyclized xanthommatin (Bolognese et al., 1988b). Such mechanism  
624 has been well described for the biogenesis of eumelanin monomers, in which the non-decarboxylative  
625 rearrangement of dopachrome is favored by the dopachrome tautomerase (Solano et al., 1996). Hence,  
626 this analogy raises the intriguing possibility that a tautomerase might catalyze the formation of  
627 xanthommatin from uncyclized xanthommatin (Fig 8), thereby controlling the relative content of  
628 decarboxylated xanthommatin in ommochromosomes, which is known to vary among species,  
629 individuals and chromatophores (Futahashi et al., 2012; Williams et al., 2016; Zhang et al., 2017).  
630 Why decarboxylated xanthommatin levels depend on the biological context may rely on its biological  
631 functions, which we further discuss in the Supplemental File S3.

632 How ommatins and ommins, the two most abundant families of ommochromes, are  
633 biochemically connected to each other is still a mystery (Figon and Casas, 2019). Purple ommins have  
634 higher molecular weights than ommatins and derive from both 3-hydroxykynurenine and

*Uncyclized xanthommatin in ommochrome biosynthesis*

635 cysteine/methionine, the latter providing sulfur to the phenothiazine ring of ommins (Linzen, 1974;  
636 Needham, 1974). The best-known ommin is called ommin A, whose structure was proposed to be a  
637 trimer of 3-hydroxykynurenine in which one of the phenoxazine ring is replaced by phenothiazine (Fig  
638 8) (Needham, 1974). Since the pyrido[3,2-*a*]phenoxazinone cannot be reopened to an amino-  
639 phenoxazinone in anyway (Bolognese and Liberatore, 1988), it is unlikely that the biosynthesis of  
640 ommins is a side-branch of ommatins. Thus, the biochemical relationship between ommatins and  
641 ommins should be found upstream in the biosynthetic pathway of ommochromes. Older genetic and  
642 chemical studies demonstrated that ommins and ommatins share the kynurenine pathway and Linzen  
643 proposed that the ratio of xanthommatin to ommins could depend on the level of methionine-derived  
644 precursors (Linzen, 1974). The distinct structure of uncyclized xanthommatin raises the interesting  
645 hypothesis that uncyclized xanthommatin is the elusive intermediate between the *ortho*-aminophenol  
646 structure of 3-hydroxykynurenine, the pyrido-phenoxazinone chromophore of xanthommatin and the  
647 phenoxazine-phenothiazine structure of ommins. We propose that the biosynthesis of ommins first  
648 proceeds with the dimerization of 3-hydroxykynurenine into uncyclized xanthommatin, then with the  
649 stabilization of its amino acid chain to avoid a spontaneous intramolecular cyclization, and finally with  
650 the condensation with a sulfur-containing compound derived from methionine/cysteine (Fig 8).  
651 Although this mechanism is hypothetical at this stage, it can explain two apparently unrelated  
652 observations. First, it clarifies the reason why *cardinal* mutants of insects, which lack the heme  
653 peroxidase Cardinal that possibly catalyzes the formation of uncyclized xanthommatin, lack both  
654 ommatins and ommins, and accumulate 3-hydroxykynurenine (Howells et al., 1977; Osanai-Futahashi  
655 et al., 2016). Second, it could explain how a single cephalopod chromatophore can change its color  
656 from yellow (ommatins) to purple (ommins) across its lifetime (Reiter et al., 2018). The biochemical  
657 mechanism might be analogous to the casing model of melanins (Ito and Wakamatsu, 2008), in which  
658 pheomelanins and eumelanins (in this case ommins and ommatins, respectively) are produced  
659 sequentially from the same precursors (uncyclized xanthommatin) through changes in sulfur  
660 (methionine/cysteine) availability within melanosomes (ommochromosomes).

661 Overall, uncyclized xanthommatin appears as a key metabolite in the ommochrome pathway  
662 by leading to either ommatins, decarboxylated ommatins or ommins (Fig 8). Therefore, the formation  
663 of uncyclized xanthommatin might represent a key step in the divergence between the post-kynurenine  
664 pathways of vertebrates and invertebrates, as well as in the structural diversification of ommochromes  
665 in phylogenetically-distant invertebrates.

## 666 **5. Acknowledgments**

667 We thank Kévin Billet, Cédric Delevoye and Emmanuel Gaquerel for fruitful discussions. We are  
668 grateful to Antoine Touzé for his technical assistance and for access to the ultracentrifuge. We thank  
669 Rustem Uzbekov for providing the electron micrograph. The ENS de Lyon is thanked for financial  
670 support (to F. F.). This study formed part of the doctoral dissertation of F. F. under the supervision of  
671 J. C.

672 **Conflict of interest:** The authors declare that they have no conflicts of interest with the contents of  
673 this article.

## 674 **6. References**

- 675 Bolognese, A., Correale, G., Manfra, M., Lavecchia, A., Mazzoni, O., Novellino, E., Barone, V., Pani,  
676 A., Tramontano, E., La Colla, P., Murgioni, C., Serra, I., Setzu, G., Loddo, R., 2002.  
677 Antitumor Agents. 1. Synthesis, Biological Evaluation, and Molecular Modeling of 5 *H* -  
678 Pyrido[3,2-*a*]phenoxazin-5-one, a Compound with Potent Antiproliferative Activity. *Journal*  
679 *of Medicinal Chemistry* 45, 5205–5216. <https://doi.org/10.1021/jm020913z>
- 680 Bolognese, A., Liberatore, R., 1988. Photochemistry of ommochrome pigments. *Journal of*  
681 *Heterocyclic Chemistry* 25, 1243–1246. <https://doi.org/10.1002/jhet.5570250438>
- 682 Bolognese, A., Liberatore, R., Piscitelli, C., Scherillo, G., 1988a. A Light-Sensitive Yellow  
683 Ommochrome Pigment From the House Fly. *Pigment Cell Research* 1, 375–378.  
684 <https://doi.org/10.1111/j.1600-0749.1988.tb00137.x>
- 685 Bolognese, A., Liberatore, R., Riente, G., Scherillo, G., 1988b. Oxidation of 3-hydroxykynurenine. A  
686 reexamination. *Journal of Heterocyclic Chemistry* 25, 1247–1250.  
687 <https://doi.org/10.1002/jhet.5570250439>
- 688 Bolognese, A., Liberatore, R., Scherillo, G., 1988c. Photochemistry of ommochromes and related  
689 compounds. *Journal of Heterocyclic Chemistry* 25, 979–983.  
690 <https://doi.org/10.1002/jhet.5570250353>
- 691 Bolognese, A., Liberatore, R., Scherillo, G., 1988d. Photochemistry of ommochromes and related  
692 compounds. Part II. *Journal of Heterocyclic Chemistry* 25, 1251–1254.  
693 <https://doi.org/10.1002/jhet.5570250440>
- 694 Bolognese, A., Scherillo, G., 1974. Occurrence and characterization of a labile xanthommatin  
695 precursor in some invertebrates. *Experientia* 30, 225–226.  
696 <https://doi.org/10.1007/BF01934793>

- 697 Butenandt, A., 1957. Über Ommochrome, eine Klasse natürlicher Phenoxazon-Farbstoffe.  
698 *Angewandte Chemie* 69, 16–23. <https://doi.org/10.1002/ange.19570690104>
- 699 Butenandt, A., Schäfer, W., 1962. Ommochromes, in: *Recent Progress in the Chemistry of Natural and*  
700 *Synthetic Colouring Matters and Related Fields*. Academic Press, New York, NY, pp. 13–33.
- 701 Butenandt, A., Schiedt, U., Biekert, E., 1954. Über Ommochrome, III. Mitteilung: Synthese des  
702 Xanthommatins. *Justus Liebigs Annalen der Chemie* 588, 106–116.
- 703 Cölln, K., Hedemann, R., Ojijo, E., 1981. A method for the isolation of ommochrome-containing  
704 granules from insect eyes. *Experientia* 37, 44–46.
- 705 Crescenzi, O., Correale, G., Bolognese, A., Piscopo, V., Parrilli, M., Barone, V., 2004. Observed and  
706 calculated <sup>1</sup>H- and <sup>13</sup>C-NMR chemical shifts of substituted 5H-pyrido[3,2-a]- and 5H-  
707 pyrido[2,3-a]phenoxazin-5-ones and of some 3H-phenoxazin-3-one derivatives. *Org. Biomol.*  
708 *Chem.* 2, 1577–1581. <https://doi.org/10.1039/B401147C>
- 709 Croucher, P.J., Brewer, M.S., Winchell, C.J., Oxford, G.S., Gillespie, R.G., 2013. De novo  
710 characterization of the gene-rich transcriptomes of two color-polymorphic spiders, *Theridion*  
711 *grallator* and *T. californicum* (Araneae: Theridiidae), with special reference to pigment genes.  
712 *BMC Genomics* 14, 862. <https://doi.org/10.1186/1471-2164-14-862>
- 713 Ewart, G.D., Cannell, D., Cox, G.B., Howells, A.J., 1994. Mutational analysis of the traffic ATPase  
714 (ABC) transporters involved in uptake of eye pigment precursors in *Drosophila melanogaster*.  
715 Implications for structure-function relationships. *J. Biol. Chem.* 269, 10370–10377.
- 716 Figon, F., Casas, J., 2019. Ommochromes in invertebrates: biochemistry and cell biology. *Biological*  
717 *Reviews* 94, 156–183. <https://doi.org/10.1111/brv.12441>
- 718 Futahashi, R., Kurita, R., Mano, H., Fukatsu, T., 2012. Redox alters yellow dragonflies into red.  
719 *Proceedings of the National Academy of Sciences* 109, 12626–12631.  
720 <https://doi.org/10.1073/pnas.1207114109>
- 721 Guijas, C., Montenegro-Burke, J.R., Domingo-Almenara, X., Palermo, A., Warth, B., Hermann, G.,  
722 Koellensperger, G., Huan, T., Uritboonthai, W., Aisporna, A.E., Wolan, D.W., Spilker, M.E.,  
723 Benton, H.P., Siuzdak, G., 2018. METLIN: A Technology Platform for Identifying Knowns  
724 and Unknowns. *Analytical Chemistry* 90, 3156–3164.  
725 <https://doi.org/10.1021/acs.analchem.7b04424>
- 726 Han, Q., Beerntsen, B.T., Li, J., 2007. The tryptophan oxidation pathway in mosquitoes with emphasis  
727 on xanthurenic acid biosynthesis. *Journal of Insect Physiology* 53, 254–263.  
728 <https://doi.org/10.1016/j.jinsphys.2006.09.004>
- 729 Hori, M., Riddiford, L.M., 1981. Isolation of ommochromes and 3-hydroxykynurenine from the  
730 tobacco hornworm, *Manduca sexta*. *Insect Biochemistry* 11, 507–513.  
731 [https://doi.org/10.1016/0020-1790\(81\)90018-4](https://doi.org/10.1016/0020-1790(81)90018-4)
- 732 Howells, A.J., Summers, K.M., Ryall, R.L., 1977. Developmental patterns of 3-hydroxykynurenine  
733 accumulation in white and various other eye color mutants of *Drosophila melanogaster*.  
734 *Biochem. Genet.* 15, 1049–1059.
- 735 Ito, S., Wakamatsu, K., 2008. Chemistry of Mixed Melanogenesis—Pivotal Roles of Dopaquinone.  
736 *Photochemistry and Photobiology* 84, 582–592. [https://doi.org/10.1111/j.1751-](https://doi.org/10.1111/j.1751-1097.2007.00238.x)  
737 [1097.2007.00238.x](https://doi.org/10.1111/j.1751-1097.2007.00238.x)
- 738 Iwahashi, H., Ishii, T., 1997. Detection of the oxidative products of 3-hydroxykynurenine using high-  
739 performance liquid chromatography–electrochemical detection–ultraviolet absorption  
740 detection–electron spin resonance spectrometry and high-performance liquid  
741 chromatography–electrochemical detection–ultraviolet absorption detection–mass  
742 spectrometry. *Journal of Chromatography A* 773, 23–31.
- 743 Kumar, A., Williams, T.L., Martin, C.A., Figueroa-Navedo, A.M., Deravi, L.F., 2018. Xanthommatin-  
744 Based Electrochromic Displays Inspired by Nature. *ACS Applied Materials & Interfaces*.  
745 <https://doi.org/10.1021/acsami.8b14123>
- 746 Linzen, B., 1974. The Tryptophan → Ommochrome Pathway in Insects, in: Treherne, J.E., Berridge,  
747 M.J., Wigglesworth, V.B. (Eds.), *Advances in Insect Physiology*. Elsevier, Academic Press,  
748 pp. 117–246.

- 749 Mackenzie, S.M., Howells, A.J., Cox, G.B., Ewart, G.D., 2000. Sub-cellular localisation of the  
750 white/scarlet ABC transporter to pigment granule membranes within the compound eye of  
751 *Drosophila melanogaster*. *Genetica* 108, 239–252.
- 752 Nakazawa, H., Chou, F.E., Andrews, P.A., Bachur, N.R., 1981. Chemical reduction of actinomycin D  
753 and phenoxazone analog to free radicals. *J. Org. Chem.* 46, 1493–1496.  
754 <https://doi.org/10.1021/jo00320a054>
- 755 Needham, A.E., 1974. The significance of zochromes, *Zoophysiology and ecology*. Springer-Verlag,  
756 Berlin, Heidelberg, New York.
- 757 Osanai-Futahashi, M., Tatematsu, K., Futahashi, R., Narukawa, J., Takasu, Y., Kayukawa, T.,  
758 Shinoda, T., Ishige, T., Yajima, S., Tamura, T., Yamamoto, K., Sezutsu, H., 2016. Positional  
759 cloning of a *Bombyx* pink-eyed white egg locus reveals the major role of cardinal in  
760 ommochrome synthesis. *Heredity* 116, 135–145. <https://doi.org/10.1038/hdy.2015.74>
- 761 Panettieri, S., Gjinaj, E., John, G., Lohman, D.J., 2018. Different ommochrome pigment mixtures  
762 enable sexually dimorphic Batesian mimicry in disjunct populations of the common palmfly  
763 butterfly, *Elymnias hypermnestra*. *PLOS ONE* 13, e0202465.  
764 <https://doi.org/10.1371/journal.pone.0202465>
- 765 Parrilli, M., Bolognese, A., 1992. <sup>1</sup>H and <sup>13</sup>C Chemical Shift Data of Some Ommochrome Models:  
766 Substituted Benzo[3,2-a]-5H-phenoxazin-5-one. *Heterocycles* 34, 1829.  
767 <https://doi.org/10.3987/COM-92-6106>
- 768 Reiter, S., Hülsdunk, P., Woo, T., Lauterbach, M.A., Eberle, J.S., Akay, L.A., Longo, A., Meier-  
769 Credo, J., Kretschmer, F., Langer, J.D., Kaschube, M., Laurent, G., 2018. Elucidating the  
770 control and development of skin patterning in cuttlefish. *Nature* 562, 361–366.  
771 <https://doi.org/10.1038/s41586-018-0591-3>
- 772 Riddiford, L.M., Ajami, A.M., 1971. Identification of an ommochrome in the eyes and nervous  
773 systems of saturniid moths. *Biochemistry* 10, 1451–1455.  
774 <https://doi.org/10.1021/bi00784a028>
- 775 Riou, M., Christidès, J.-P., 2010. Cryptic Color Change in a Crab Spider (*Misumena vatia*):  
776 Identification and Quantification of Precursors and Ommochrome Pigments by HPLC. *Journal*  
777 *of Chemical Ecology* 36, 412–423. <https://doi.org/10.1007/s10886-010-9765-7>
- 778 Solano, F., Jiménez-Cervantes, C., Martín-Nez-Liarte, J.H., García-Borrón, J.C., Jara, J.R., Lozano,  
779 J.A., 1996. Molecular mechanism for catalysis by a new zinc-enzyme, dopachrome  
780 tautomerase. *Biochemical Journal* 313, 447–453. <https://doi.org/10.1042/bj3130447>
- 781 Stevens, R., Stevens, L., Price, N., 1983. The stabilities of various thiol compounds used in protein  
782 purifications. *Biochemical Education* 11, 70. [https://doi.org/10.1016/0307-4412\(83\)90048-1](https://doi.org/10.1016/0307-4412(83)90048-1)
- 783 Stubenhaus, B.M., Dustin, J.P., Neverett, E.R., Beaudry, M.S., Nadeau, L.E., Burk-McCoy, E., He, X.,  
784 Pearson, B.J., Pellettieri, J., 2016. Light-induced depigmentation in planarians models the  
785 pathophysiology of acute porphyrias. *eLife* 5, e14175.
- 786 Vazquez, S., Truscott, R.J.W., O’Hair, R.A.J., Weimann, A., Sheil, M.M., 2001. A study of  
787 kynurenine fragmentation using electrospray tandem mass spectrometry. *Journal of the*  
788 *American Society for Mass Spectrometry* 12, 786–794. [https://doi.org/10.1016/S1044-0305\(01\)00255-0](https://doi.org/10.1016/S1044-0305(01)00255-0)
- 790 Williams, T.L., DiBona, C.W., Dinneen, S.R., Jones Labadie, S.F., Chu, F., Deravi, L.F., 2016.  
791 Contributions of Phenoxazone-Based Pigments to the Structure and Function of  
792 Nanostructured Granules in Squid Chromatophores. *Langmuir* 32, 3754–3759.  
793 <https://doi.org/10.1021/acs.langmuir.6b00243>
- 794 Williams, T.L., Lopez, S.A., Deravi, L.F., 2019a. A Sustainable Route To Synthesize the  
795 Xanthommatin Biochrome via an Electro-catalyzed Oxidation of Tryptophan Metabolites.  
796 *ACS Sustainable Chem. Eng.* [acssuschemeng.9b01144](https://doi.org/10.1021/acssuschemeng.9b01144).  
797 <https://doi.org/10.1021/acssuschemeng.9b01144>
- 798 Williams, T.L., Senft, S.L., Yeo, J., Martín-Martínez, F.J., Kuzirian, A.M., Martin, C.A., DiBona,  
799 C.W., Chen, C.-T., Dinneen, S.R., Nguyen, H.T., Gomes, C.M., Rosenthal, J.J.C., MacManes,  
800 M.D., Chu, F., Buehler, M.J., Hanlon, R.T., Deravi, L.F., 2019b. Dynamic pigmentary and  
801 structural coloration within cephalopod chromatophore organs. *Nature Communications* 10.  
802 <https://doi.org/10.1038/s41467-019-08891-x>

*Uncyclized xanthommatin in ommochrome biosynthesis*

803 Zhang, H., Lin, Y., Shen, G., Tan, X., Lei, C., Long, W., Liu, H., Zhang, Y., Xu, Y., Wu, J., Gu, J.,  
 804 Xia, Q., Zhao, P., 2017. Pigmentary analysis of eggs of the silkworm *Bombyx mori*. *Journal*  
 805 *of Insect Physiology* 101, 142–150. <https://doi.org/10.1016/j.jinsphys.2017.07.013>  
 806 Zhuravlev, A.V., Vetrovoy, O.V., Savvateeva-Popova, E.V., 2018. Enzymatic and non-enzymatic  
 807 pathways of kynurenines' dimerization: the molecular factors for oxidative stress  
 808 development. *PLOS Computational Biology* 14, e1006672.  
 809 <https://doi.org/10.1371/journal.pcbi.1006672>  
 810

811

812 **Figures**

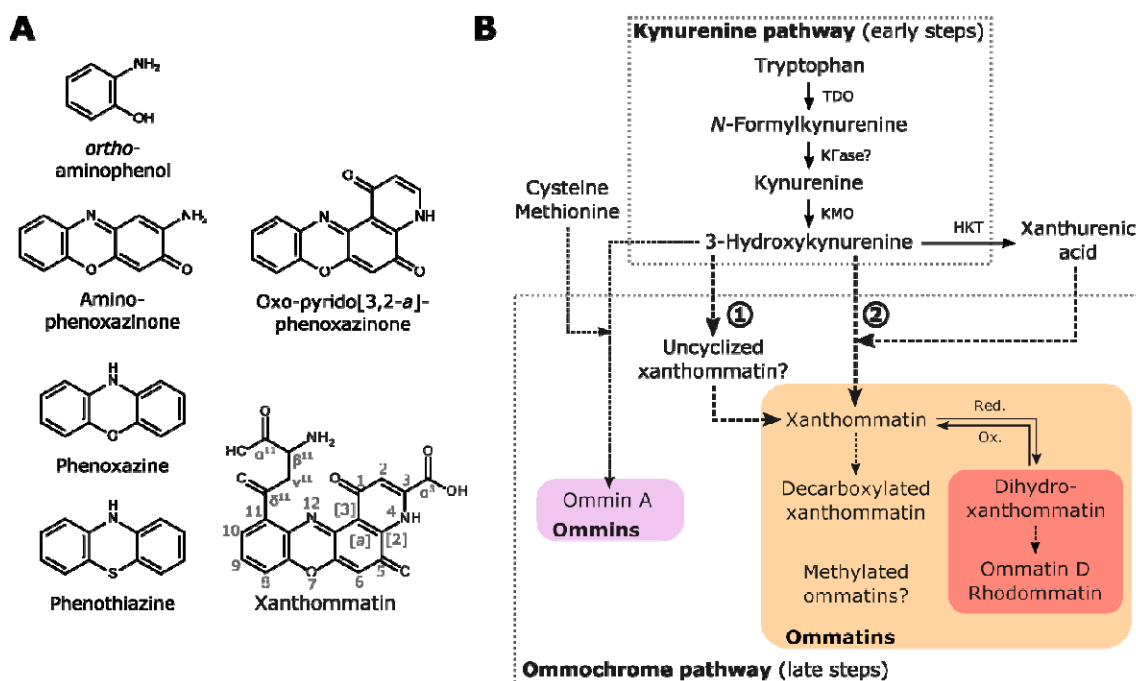

813

814 Fig 1. Current knowledge of the tryptophan→ommochrome pathway of invertebrates. A) Main chemical structures and  
 815 chromophores of the tryptophan→ommochrome pathway. Numbering of ommatins used in this study is indicated on the  
 816 structure of xanthommatin. B) Kynurenine and ommochrome pathways form the early and late steps of the  
 817 tryptophan→ommochrome pathway, respectively. Ommatins are possibly biosynthesized via two routes: (1) the dimerization  
 818 of 3-hydroxykynurenine into the intermediary uncyclized xanthommatin, or (2) the direct condensation of 3-  
 819 hydroxykynurenine with its cyclized form, xanthurenic acid. Ommatin and ommin pathways share 3-hydroxykynurenine as a  
 820 precursor, but at which step they diverge is not known. Dashed arrows, steps for which we lack clear biological evidence.  
 821 HKT, 3-hydroxykynurenine transaminase. KFase, kynurenine formamidase. KMO, kynurenine 3-monooxygenase. Ox.,  
 822 oxidation. Red., reduction. TDO, tryptophan 2,3-dioxygenase.

*Uncyclized xanthommatin in ommochrome biosynthesis*

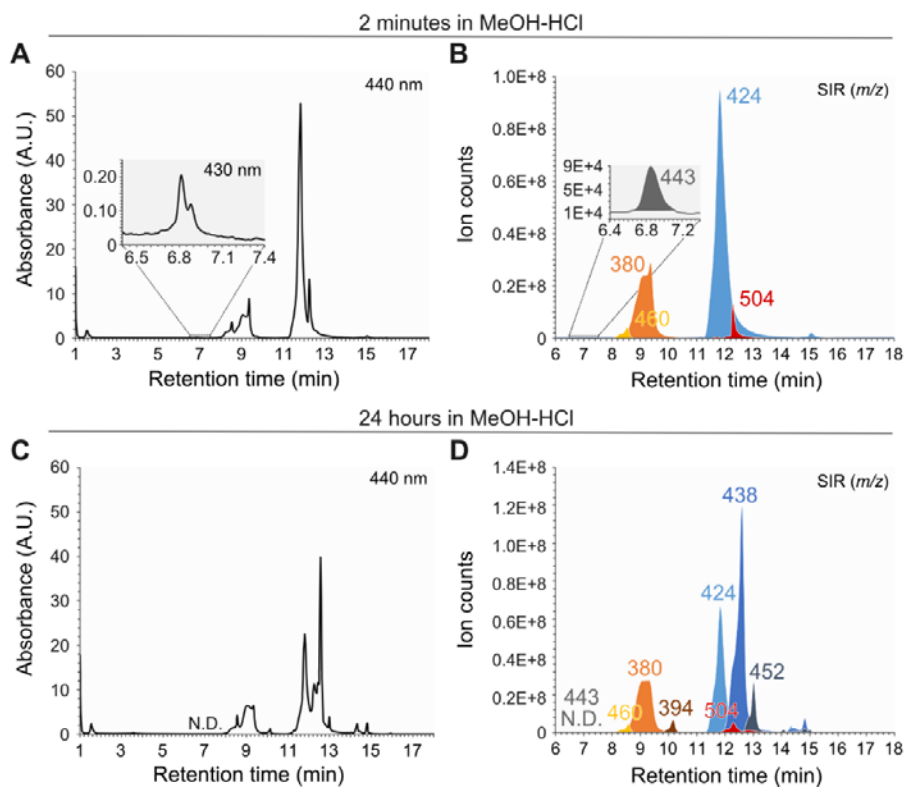

823

824 Fig 2. **Chromatographic profiles of synthesized xanthommatin before and after storage in acidified methanol.**

825 Xanthommatin was synthesized by oxidizing 3-hydroxykynurenine with potassium ferricyanide. (A-B) The ommatin solution

826 was subjected to liquid chromatography (LC) two minutes after solubilization in methanol acidified with 0.5 % HCl (MeOH-

827 HCl). The eluted compounds were detected by their absorbance at 440 and 430 nm (A). The main molecular ions

828 (electrospray ionization in positive mode) associated to each peak were monitored by a triple quadrupole mass spectrometer

829 running in single ion reaction (SIR) mode (B). (C-D) The same ommatin solution was left for 24 hours at 20 °C in complete

830 darkness. Compounds were separated by LC and detected using the same absorbance (A) and MS modalities (B) as described

831 above.



*Uncyclized xanthommatin in ommochrome biosynthesis*

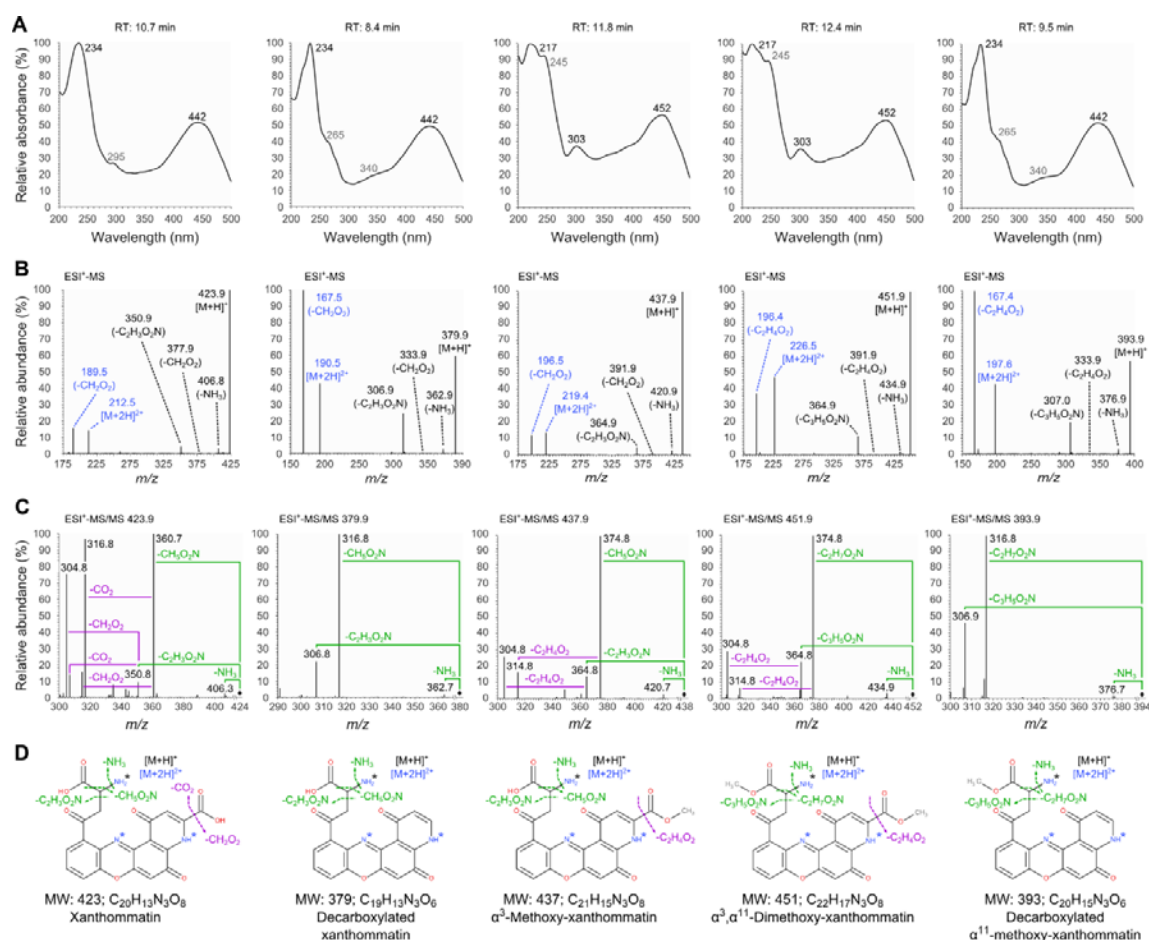

832

833 Fig 3. Absorbance- and mass spectrometry-assisted elucidation of the structure of the five major ommatins detected  
 834 after incubation in acidified methanol. Ommatins incubated for 24 hours in acidified methanol were analysed by liquid  
 835 chromatography coupled to a photodiode-array detector and a triple quadrupole mass spectrometer. (A) Absorbance spectra.  
 836 For each metabolite, absorbance values were reported as percentages of the maximum absorbance value recorded in the range  
 837 of 200 to 500 nm. Major and minor absorbance peaks are indicated in black and grey fonts, respectively. (B) Mass spectra  
 838 showing molecular ions and in-source fragments. Black fonts, mono-charged ions. Blue fonts, double-charged for this molecular ion.  
 839 (C) Tandem mass (MS/MS) spectra of molecular ions obtained by collision-induced dissociation with argon. Black  
 840 diamonds,  $[M+H]^+$   $m/z$ . Green fonts, fragmentations of the amino acid chain. Purple fonts, fragmentations of the pyridine  
 841 ring are indicated. (D) Elucidated structures of the five ommatins. MS/MS fragmentations are reported in green and purple  
 842 like in panel C. Black asterisk, main charged basic site. Blue asterisks, potential charged basic sites of the double-charged  
 843 molecular ions.

*Uncyclized xanthommatin in ommochrome biosynthesis*

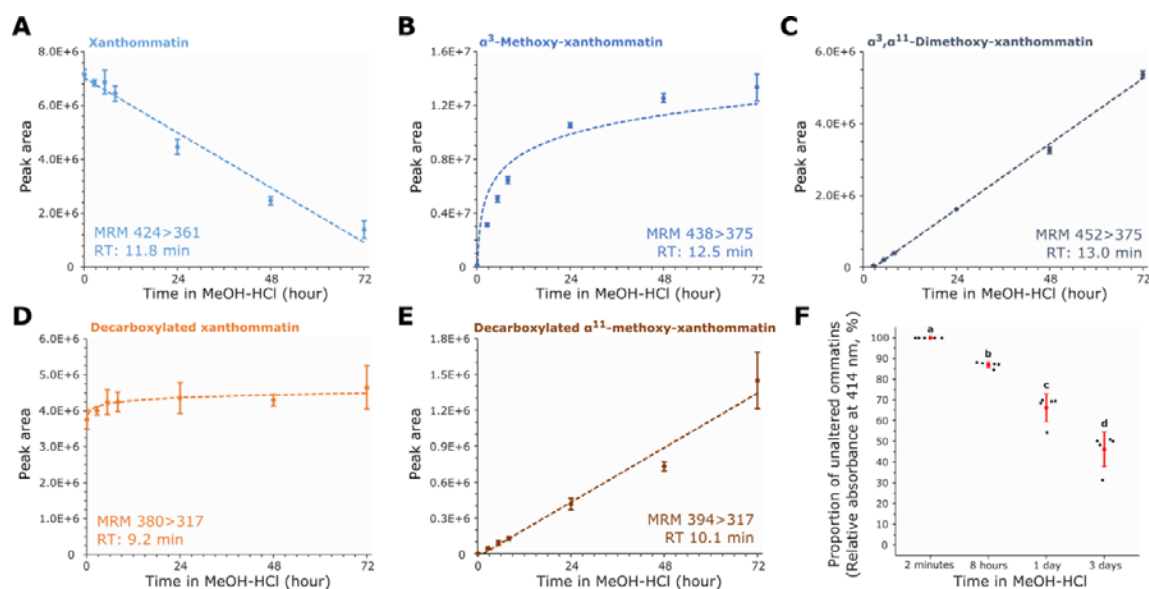

844

845 Fig 4. **Alterations of synthesized ommatins in acidified methanol at 20 °C in darkness.** Synthesized ommatins were  
846 solubilized in methanol acidified with 0.5 % HCl (MeOH-HCl) and stored for up to three days at 20 °C and in complete  
847 darkness. (A-E) Kinetics of alterations were followed by multiple reaction monitoring (MRM) mode of xanthommatin (A),  
848  $\alpha^3$ -methoxy-xanthommatin (B),  $\alpha^3, \alpha^{11}$ -dimethoxy-xanthommatin (C), decarboxylated xanthommatin (D) and decarboxylated  
849  $\alpha^{11}$ -xanthommatin (E). Values are mean  $\pm$  SD of four to five samples. See Supplemental File S2 for information on  
850 regression analyses. (F) Relative quantifications of methoxylated ommatins compared to unaltered ones (i.e. xanthommatin  
851 and decarboxylated xanthommatin) were performed by measuring the absorbance of ommatins at 414 nm for each time point.  
852 Values are mean  $\pm$  SD of five samples. Different letters indicate statistical differences (Kruskal-Wallis rank sum test:  $\chi^2 =$   
853 17.857, df = 3, p-value = 0.00047; pairwise comparisons using Wilcoxon rank sum test and Holm adjustment: p-values <  
854 0.05).

*Uncyclized xanthommatin in ommochrome biosynthesis*

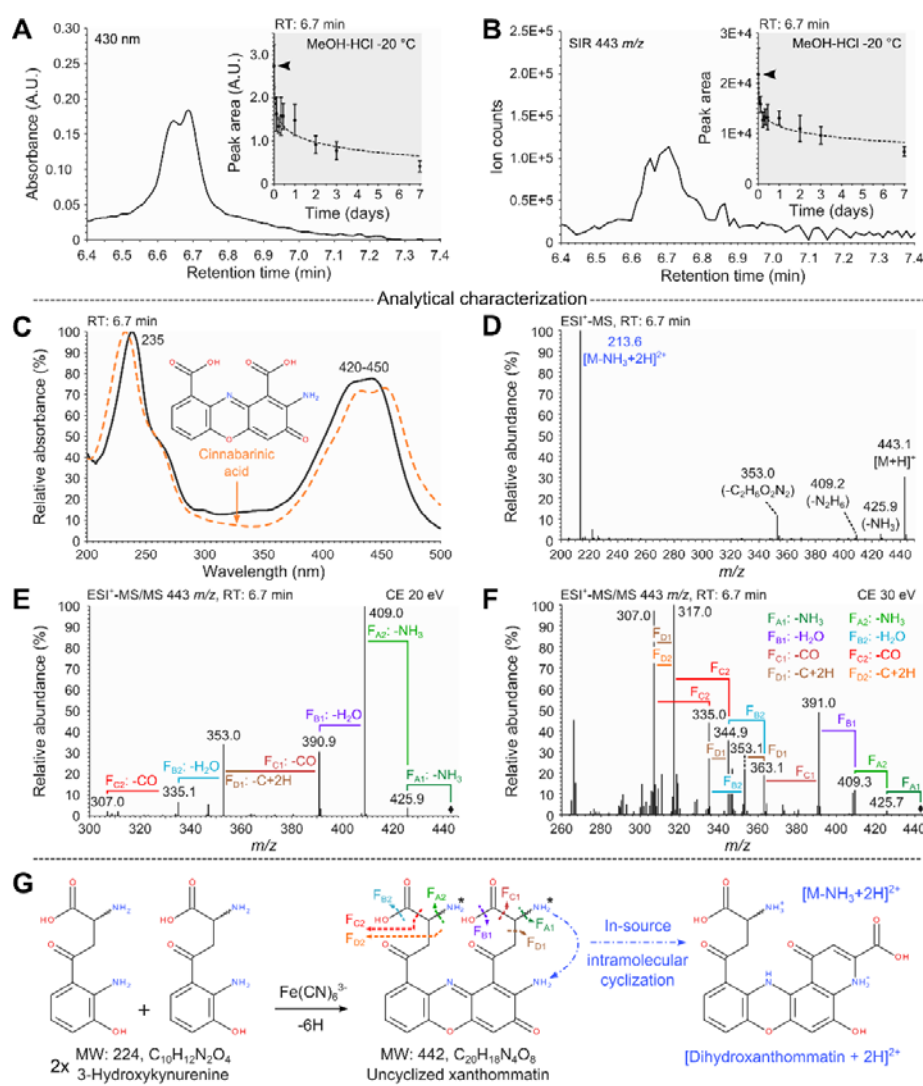

855

856 Fig 5. **Structural elucidation of uncyclized xanthommatin, the labile intermediate in the synthesis of xanthommatin.**

857 (A-B) Chromatographic peaks (absorbance at 430 nm [A] and  $[M+H]^+$  443 m/z recorded in single ion reaction [SIR] mode

858 [B]) corresponding to the labile ommatin-like compound detected in *in vitro* synthesis of xanthommatin by the oxidation (which was not

859 3-hydroxykynurenine with  $Fe(CN)_6^{3-}$ . Insets show the decay of chromatographic peaks during storage in methanol acidified

860 with 0.5 % HCl at -20 °C in darkness. Values are mean  $\pm$  SD of five samples. See Supplemental File S2 for information on

861 regression analysis. (C) Absorbance spectra. Solid line, labile ommatin-like compound. Dashed line, the

862 aminophenoxazinone cinnabarinic acid. (D) Mass spectrum showing molecular ions and in-source fragments. Black fonts,

863 monocharged ions. Blue font, double-charged ion. (E-F) Tandem mass spectra of the molecular ion obtained by collision-

864 induced dissociation with argon at collision energies of 20 eV (E) and 30 eV (F). Fragmentations were classified in four types

865 ( $F_A$  to  $F_D$ ) that occurred twice ( $F_{X1}$  and  $F_{X2}$ ). Black diamonds,  $[M+H]^+$  m/z. (G) Evidence for the structural elucidation of

866 uncyclized xanthommatin. Colors of the MS/MS fragmentation pattern correspond to those in panels D-F. Black asterisks,

867 potential charged basic sites.

*Uncyclized xanthommatin in ommochrome biosynthesis*

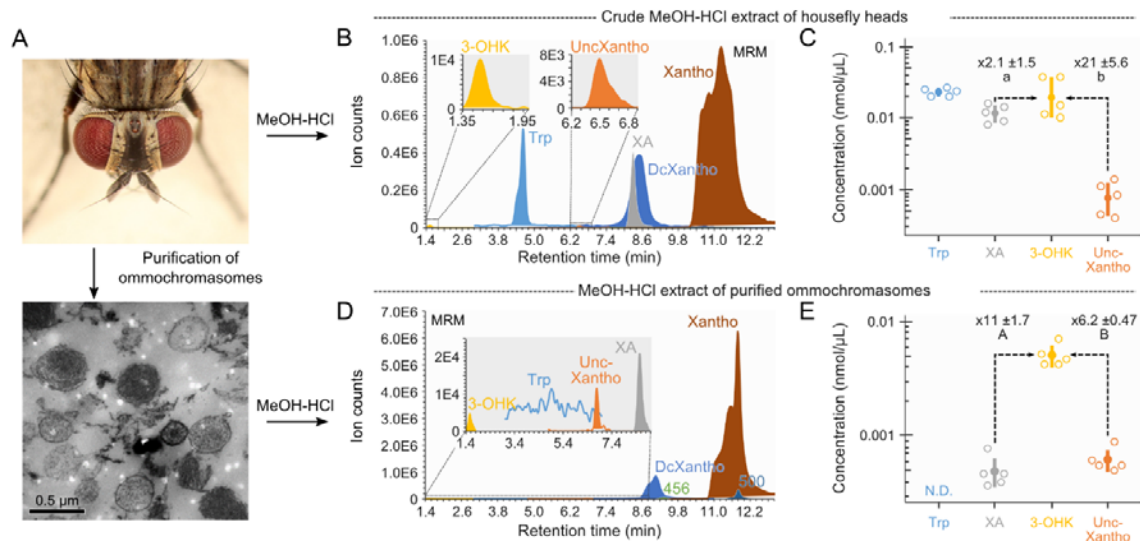

868

869 Fig 6. **Biological localization of uncyclized xanthommatin and tryptophan → ommochrome metabolites from housefly**  
 870 **eyes.** (A) Overview of the purification and extraction protocols of ommochromes from housefly eyes. (B) Chromatographic  
 871 profile in Multiple Reaction Monitoring (MRM) mode of the six main metabolites of the tryptophan → ommochrome pathway  
 872 detected in acidified methanol (MeOH-HCl) extracts of housefly eyes (crude extracts). DcXantho, decarboxylated  
 873 xanthommatin, 3-OHK, 3-hydroxykynurenine, Trp, tryptophan, UncXantho, uncyclized xanthommatin. Xantho,  
 874 xanthommatin. XA, xanthurenic acid. (C) Five μL of crude extract were injected in the chromatographic system and absolute  
 875 quantifications of tryptophan, xanthurenic acid, 3-hydroxykynurenine and uncyclized xanthommatin were performed based  
 876 on available standards (uncyclized xanthommatin levels are expressed as cinnabarinic acid equivalents). Open circles,  
 877 measures of five independent extracts. Filled circles and error bars, means ± SD of five samples. Ratios of 3-  
 878 hydroxykynurenine to xanthurenic acid and to uncyclized xanthommatin are shown (mean ± SD, N = 5). (D-E) Same as  
 879 panels B (D) and C (E) but for MeOH-HCl extracts of purified ommochromosomes from housefly eyes. The tryptophan  
 880 signal was below the signal-to-noise ratio. Statistical differences (p-value < 0.05) between ratios within panels (paired *t*-test)  
 881 and between panels (unpaired *t*-test) are indicated by different letters and capitals, respectively. N.D., not detected. See  
 882 Supplemental File S2 for information on statistical analyses. Photograph credits: (A) Sanjay Acharya (CC BY SA).

*Uncyclized xanthommatin in ommochrome biosynthesis*

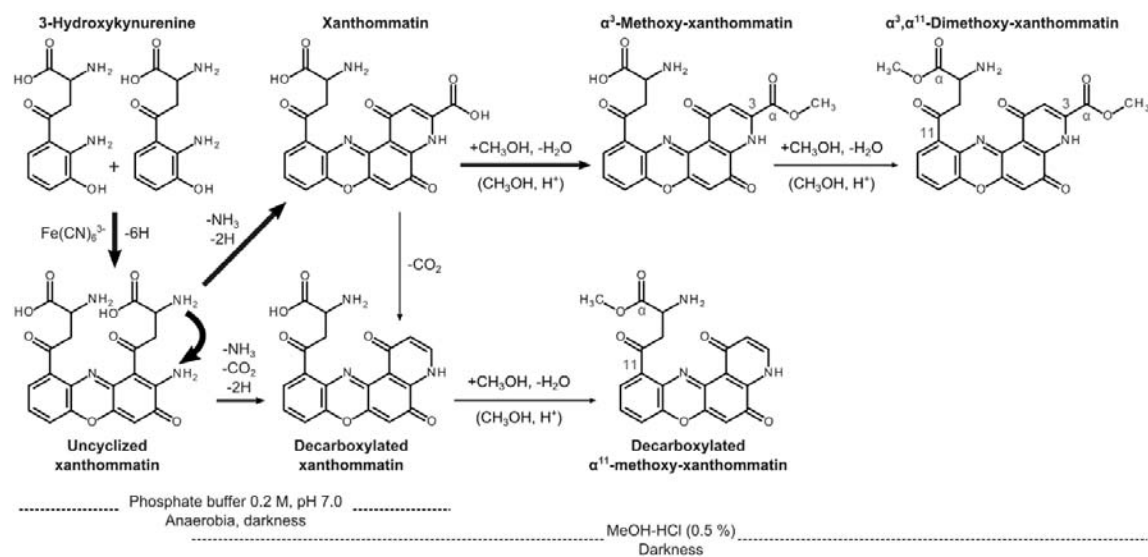

883

884 Fig 7. *In vitro* formation and alteration of ommatins. Oxidative condensation of the *ortho*-aminophenol 3-  
 885 hydroxykynurenine proceeds through the loss of six electrons, leading to the formation of the amino-phenoxazinone  
 886 uncyclized xanthommatin. Uncyclized xanthommatin then rapidly undergoes intramolecular cyclization and oxidation,  
 887 forming the two pyrido[3,2-*a*]phenoxazinone xanthommatin and decarboxylated xanthommatin. Decarboxylated  
 888 xanthommatin could also be produced from the direct decarboxylation of xanthommatin. In acidified conditions, ommatins  
 889 readily undergo thermal additions of methanol, which leads to their methoxylation. In solution, uncyclized xanthommatin  
 890 also decays by intramolecular cyclization and xanthommatin slowly decarboxylates. Relative sizes of arrows are indicative of  
 891 reaction rates.

892

*Uncyclized xanthommatin in ommochrome biosynthesis*

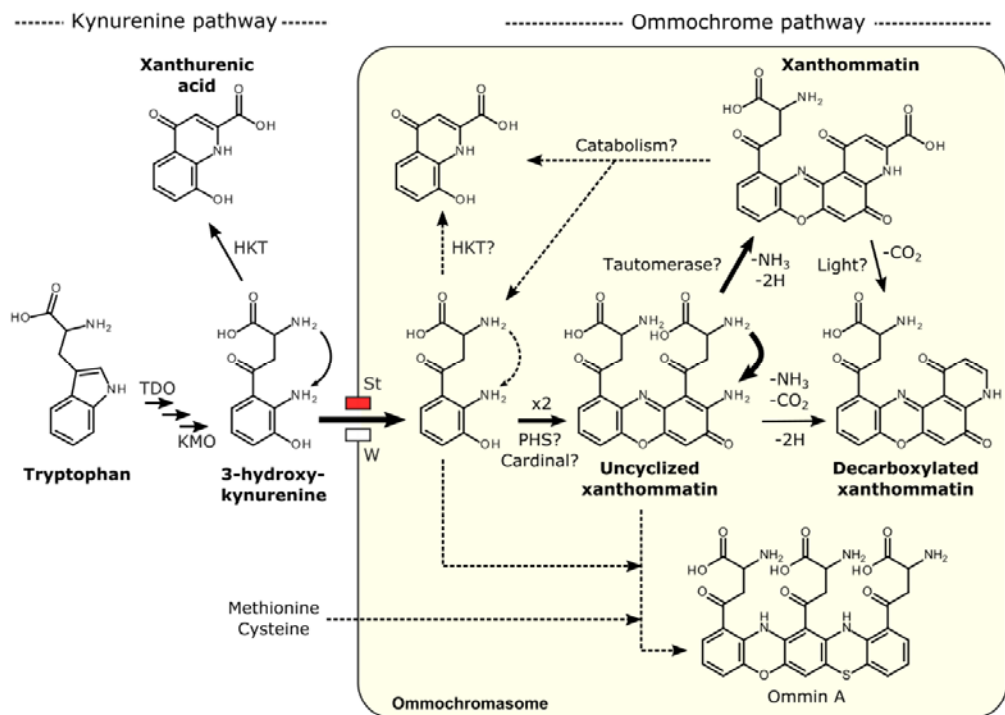

893

894 Fig 8. Proposed biosynthetic pathway of ommochromes through the formation of uncyclized xanthommatin in  
 895 ommochromosomes. See text for more details on each step. Relative sizes of arrows are indicative of reaction rates. TDO,  
 896 tryptophan 2,3-dioxygenase. KMO, kynurenine 3-monooxygenase. St, ABC transporter scarlet. W, ABC transporter white.  
 897 PHS, phenoxazinone synthase. HKT, 3-hydroxykynurenine transaminase.

*Uncyclized xanthommatin in ommochrome biosynthesis*

898 **Supplemental Data**

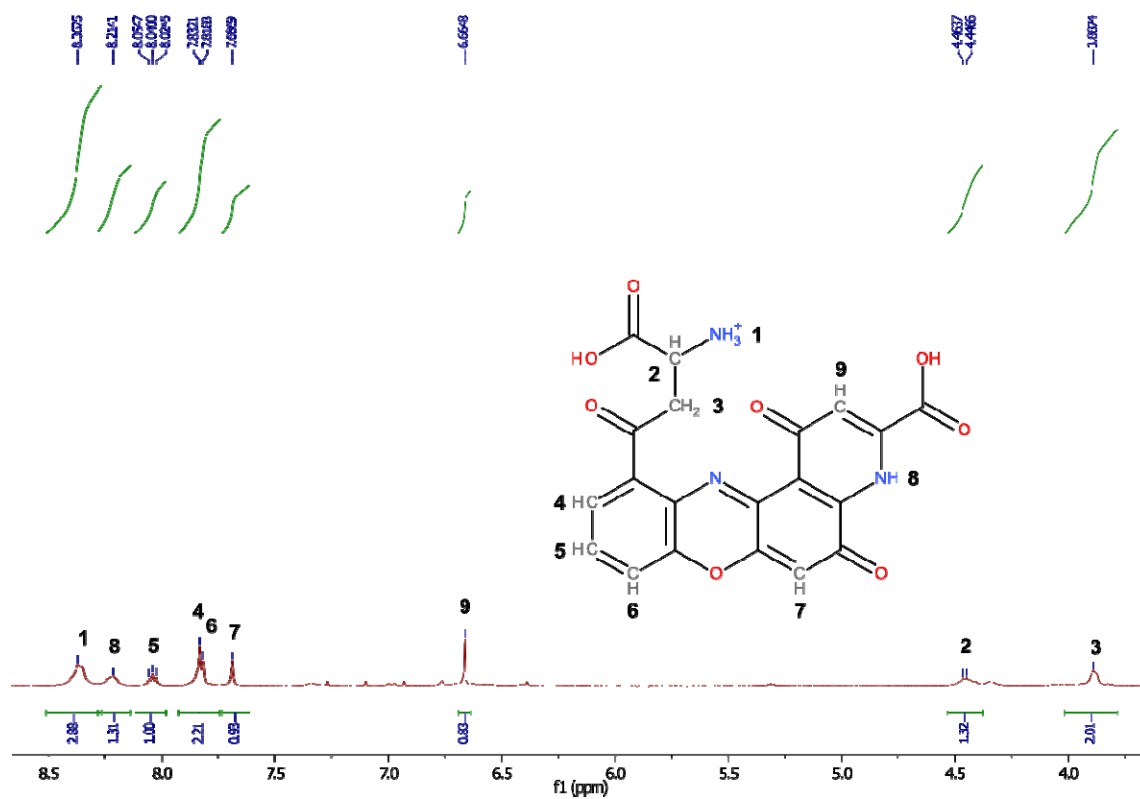

899

900 Fig S1. <sup>1</sup>H-NMR spectrum of synthesized xanthommatin in acidic DMSO.

*Uncyclized xanthommatin in ommochrome biosynthesis*

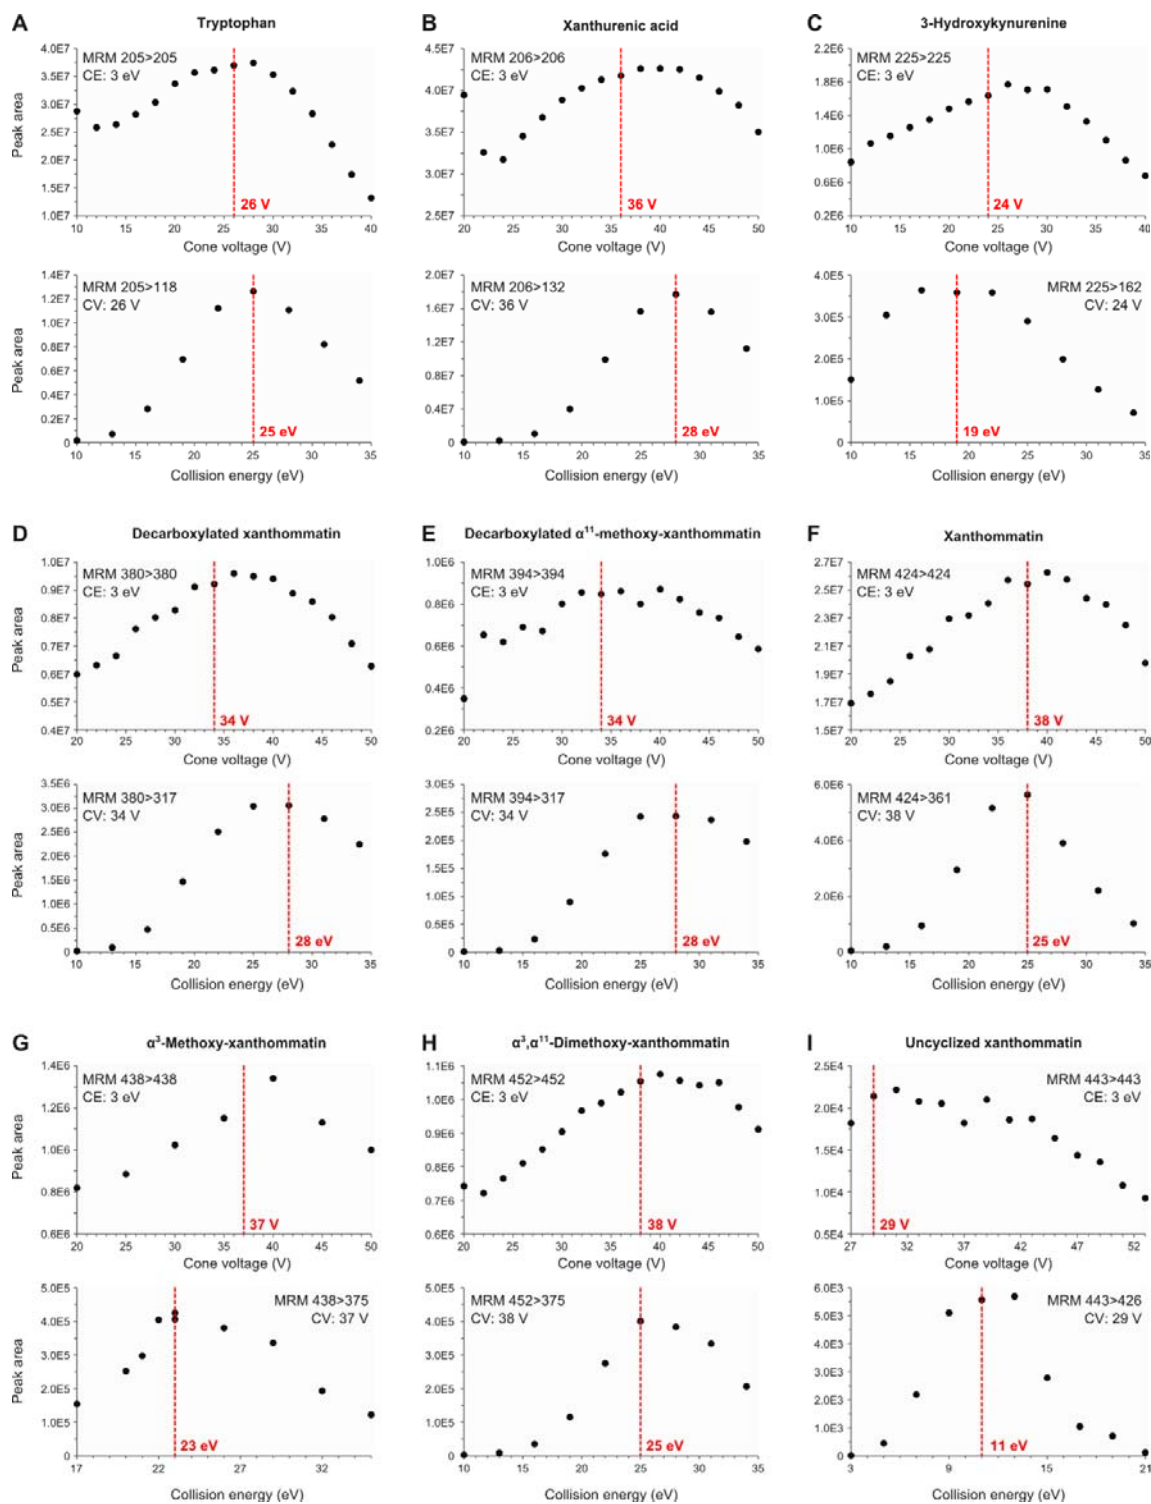

901

902 Fig S2. Optimization of cone voltages and collision energies for single reaction monitoring of ommochrome-related

903 metabolites. Optimization of cone voltages (CV) was achieved by monitoring the parent-to-parent ion transition for different

904 CV at the minimum collision energy (CE = 3 eV) during the same run. The optimum CV was defined as the CV just before



*Uncyclized xanthommatin in ommochrome biosynthesis*

905 the maximum peak area. Optimization of CE was achieved by monitoring a specific parent-to-product ion transition for  
906 different CE at the corresponding optimized CV during the same run. The optimum CE was defined as the CE corresponding  
907 to the maximum peak area.

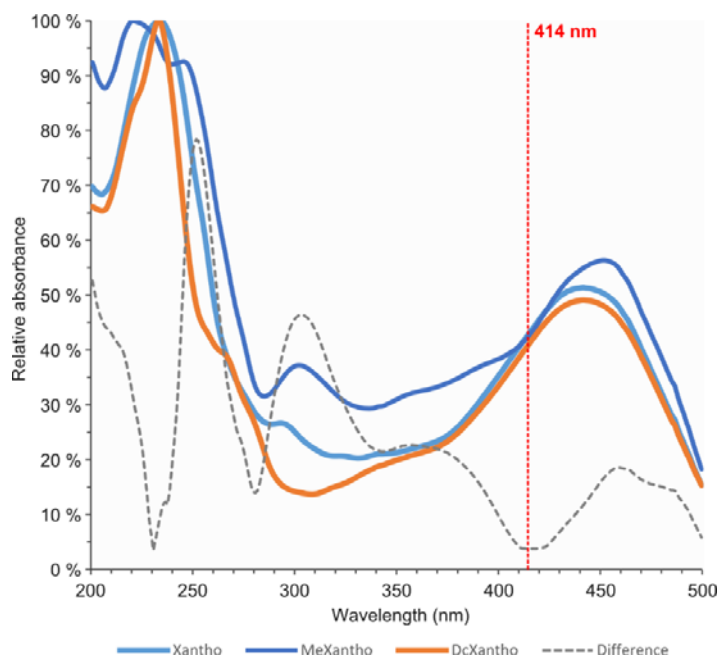

908

909 **Fig S3. Determination of the wavelength at which ommatins absorb light equivalently.** Synthesized ommatins incubated  
910 in acidified methanol were separated by liquid chromatography and analyzed by absorption spectroscopy. Relative  
911 absorbance spectra of xanthommatin (Xantho),  $\alpha^3$ -methoxy-xanthommatin (MeXantho) and decarboxylated xanthommatin  
912 (DcXantho) were reported relatively to their respective maximum absorbance value. Gray dashed curve, difference between  
913 the three relative absorbance spectra calculated with the Manhattan formula:  $\text{Difference}(x) = |\text{Abs}_{\text{Xantho}}(x) - \text{Abs}_{\text{MeXantho}}(x)| +$   
914  $|\text{Abs}_{\text{Xantho}}(x) - \text{Abs}_{\text{DcXantho}}(x)| + |\text{Abs}_{\text{MeXantho}}(x) - \text{Abs}_{\text{DcXantho}}(x)|$ . The chromophores of the three ommatins absorb light  
915 equivalently at the wavelength for which this difference is minimal, i.e. 414 nm.

916

*Uncyclized xanthommatin in ommochrome biosynthesis*

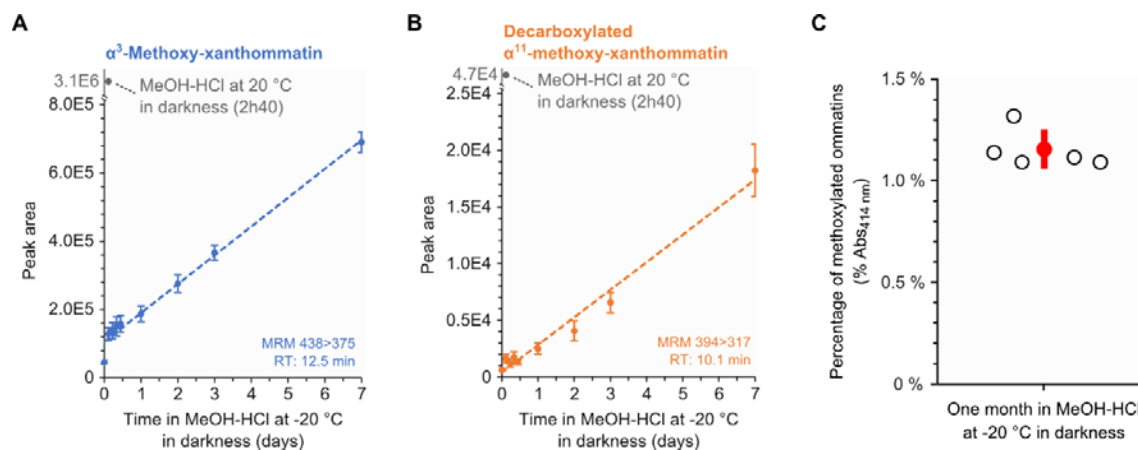

917

918 Fig S4. **Slow methoxylations of synthesized ommatins in acidified methanol at -20 °C in darkness.** Synthesized  
919 ommatins were solubilized in methanol acidified with 0.5 % (MeOH-HCl) and stored at -20 °C in darkness. Incubated  
920 ommatins were then separated by liquid chromatography. (A) Multiple reaction monitoring (MRM) signal of  $\alpha^3$ -methoxy-  
921 xanthommatin. Values are mean  $\pm$  S.D. of five samples. See File S2 for information on regression analyses. (B) MRM signal  
922 of decarboxylated  $\alpha^{11}$ -methoxy-xanthommatin. Values are mean  $\pm$  S.D. of five samples. See File S2 for information on  
923 regression analyses. (C) Relative quantities of methoxylated ommatins (i.e.  $\alpha^3$ -methoxy-xanthommatin,  $\alpha^3$ ,  $\alpha^{11}$ -dimethoxy-  
924 xanthommatin and decarboxylated  $\alpha^{11}$ -xanthommatin) in synthesized ommatins incubated in MeOH-HCl for one month at -  
925 20 °C in darkness. Quantifications were based on the absorbance of ommatins at 414 nm. Open circles, sample value. Red  
926 circle and error bar, mean value  $\pm$  S.D. of five samples.

*Uncyclized xanthommatin in ommochrome biosynthesis*

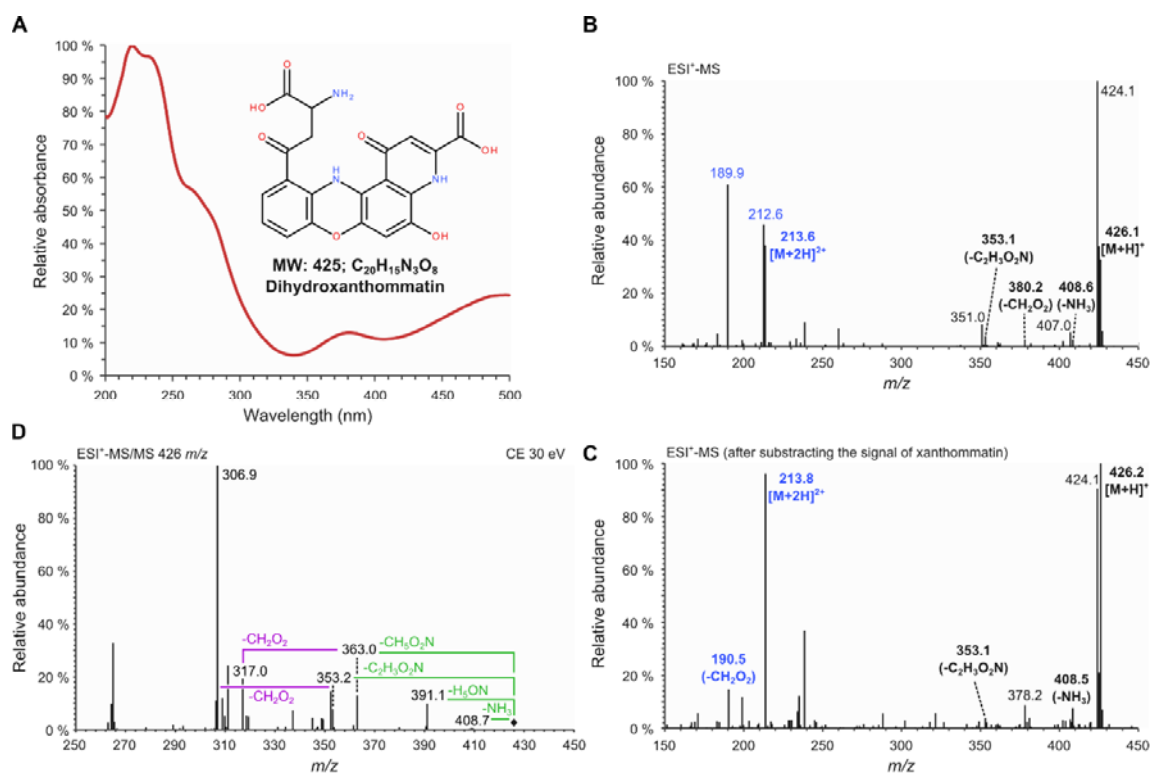

927

928 Fig S5. **Analytical characterization of dihydroxanthommatin.** Synthesized ommatins were solubilized in acidified  
 929 methanol with 0.5 % HCl and separated by liquid chromatography (see File S1 for the experimental procedure). (A)  
 930 Absorbance spectrum of dihydroxanthommatin. The peak at 480 nm makes dihydroxanthommatin appearing red in solution.  
 931 (B-C) Raw mass spectrum (B) and mass spectrum with the signal of xanthommatin from the same run subtracted (C) of  
 932 dihydroxanthommatin in positive mode. Ions associated to dihydroxanthommatin are indicated in bold fonts. Monocharged  
 933 and double-charged ions are indicated in black and blue fonts, respectively. Mass losses of in-source fragments are indicated  
 934 in parenthesis. (D) Tandem mass spectrum of dihydroxanthommatin obtained by the fragmentation of the molecular ion  
 935 [M+H]<sup>+</sup> 426 m/z at a collision energy (CE) of 30 eV. Losses corresponding to the typical fragmentation of the amino acid  
 936 chain of ommatins are indicated in green. Losses corresponding to the fragmentation of the pyrido-carboxylic acid  
 937 are reported in purple.

*Uncyclized xanthommatin in ommochrome biosynthesis*

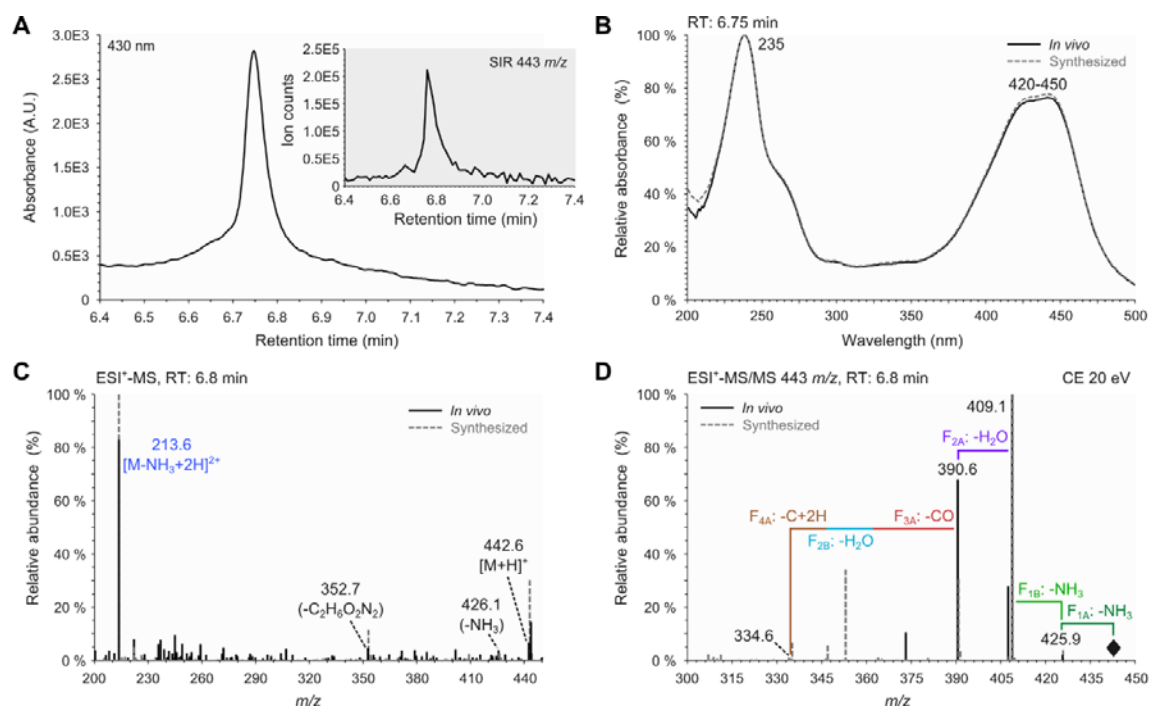

938

939 Fig S6. **Analytical characterization of uncyclized xanthommatin in methanolic extracts of housefly eyes.** (A)  
 940 Chromatographic peak of absorbance at 430 nm. Inset, corresponding chromatographic peak of the associated  $[M+H]^+$  443  
 941  $m/z$  acquired in Single Ion Recording (SIR) mode. (B) Solid curve, absorbance spectrum corresponding to the  
 942 chromatographic peak shown in panel A. Dashed curve, absorbance spectrum of synthesized uncyclized xanthommatin. (C)  
 943 Solid lines, mass spectrum (MS) corresponding to the chromatographic peak shown in the inset of panel A. Dashed lines, MS  
 944 of synthesized uncyclized xanthommatin. Black fonts, monocharged ions. Blue fonts, double-charged ion. (D) Solid lines,  
 945 tandem mass (MS/MS) spectrum corresponding to the chromatographic peak shown in the inset of panel A. Dashed lines,  
 946 MS/MS spectrum of synthesized uncyclized xanthommatin.  $F_{1A}$ ,  $F_{1B}$ ,  $F_{2A}$ ,  $F_{2B}$ ,  $F_{3A}$  and  $F_{4A}$  correspond to the fragmentations  
 947 described in Fig 5.

*Uncyclized xanthommatin in ommochrome biosynthesis*

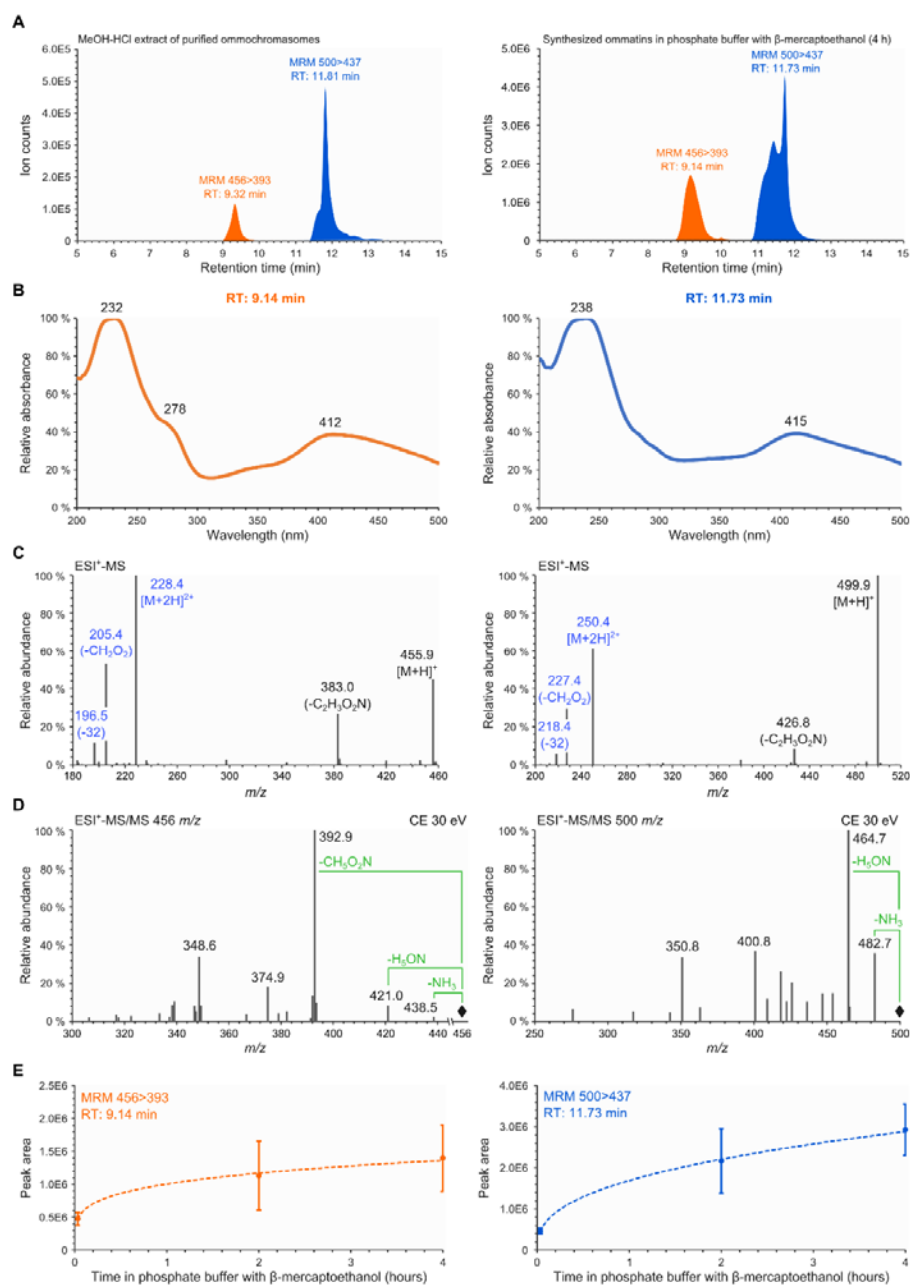

948

949 Fig S7. **Ommatins are altered by addition of  $\beta$ -mercaptoethanol.** Ommatins were separated by liquid chromatography and  
 950 analysed by absorption, mass and tandem mass spectroscopies. (A) Chromatograms of acidified methanol (MeOH-HCl)  
 951 extract of purified ommochromosomes and synthesized xanthommatin solubilized in phosphate buffer with  $\beta$ -  
 952 mercaptoethanol. Only the signals of the multiple reaction monitoring (MRM) for the 456- and 500  $m/z$ -associated  
 953 compounds are shown. (B-D) Analytical characterization of the 456- and the 500- $m/z$ -associated compounds present in  
 954 phosphate buffer with  $\beta$ -mercaptoethanol. (B) Absorbance spectra. Wavelengths of peaks are reported. (C) Mass spectra in  
 955 positive mode. Monocharged and double-charged ions are indicated in black and blue fonts, respectively. Mass losses of in-  
 956 source fragments are indicated in parenthesis. (D) Tandem mass spectra in positive mode of the molecular ions [M+H]<sup>+</sup>.

45

*Uncyclized xanthommatin in ommochrome biosynthesis*

957 Main fragments are indicated in black fonts. Losses corresponding to the typical fragmentation of the amino acid chain of  
958 ommatins are reported in green. (E) Kinetics of formation of the 456- and 500-*m/z*-associated compounds in phosphate buffer  
959 with  $\beta$ -mercaptoethanol at 20 °C in darkness. The two compounds were monitored and quantified by MRM. Values are mean  
960  $\pm$  S.D. of four samples. See File S2 for information on regression analyses.

961 **File S1. Supplemental Materials and Methods.**

962 **File S2. Report of statistical analyses.**

963 **File S3. Supplemental Discussion**
